# Supplementary material for: Clinical outcomes and peripheral tissue oxygen saturation monitoring of the knee region by near-infrared spectroscopy in circulatory shock: a prospective observational cohort study
Source: Springer Nature journal article supplement (doi:10.1186/s13054-025-05363-1), 2025-03-19
Supplement: MOESM1 [file 13054_2025_5363_MOESM1_ESM.pdf]

## **Supplementary material**

### **Clinical outcomes and peripheral tissue oxygen saturation monitoring of the knee region by near-infrared spectroscopy in circulatory shock: a prospective observational cohort study**

#### **Critical Care**

Elina Varis<sup>1</sup>, Maria Heliste<sup>1</sup>, Johanna Hästbacka<sup>2</sup>, Suvi T Vaara<sup>1</sup>, Markus B Skrifvars<sup>1</sup>, Ville Pettilä<sup>1</sup>, Mitja Lääperi<sup>3</sup>, Anne Kuitunen<sup>2</sup>, Annukka Vahtera<sup>2</sup>, Erika Wilkman<sup>1</sup>

#### **Author Information:**

##### **Affiliations:**

1. Helsinki University Hospital (Perioperative and Intensive Care) and University of Helsinki, Helsinki, Finland
2. Tampere University Hospital, Wellbeing Services County of Pirkanmaa, and Tampere University, Faculty of Medicine and Health Technology, Tampere, Finland
3. Lääperi Statistical Consulting, Espoo, Finland

#### **Corresponding author:**

Elina Varis, [elina.varis@hus.fi](mailto:elina.varis@hus.fi)

|                                                                                                        |    |
|--------------------------------------------------------------------------------------------------------|----|
| Fig. S1 Visual presentation of AUT and AOT calculations .....                                          | 4  |
| Fig. S2 Study flowchart.....                                                                           | 5  |
| Table S1 Additional patient characteristics.....                                                       | 6  |
| Fig. S3a Organ dysfunction and signs of tissue hypoperfusion.....                                      | 8  |
| Fig. S3b 90-day mortality and signs of tissue hypoperfusion.....                                       | 8  |
| Fig. S4 48-hour mean StO <sub>2</sub> and SOFA change.....                                             | 9  |
| Table S2a Additional results of univariable analyses for organ dysfunction.....                        | 10 |
| Table S2b Additional results of univariable analyses for 90-day mortality.....                         | 12 |
| Table S3a Results of AUROC analyses for organ dysfunction.....                                         | 14 |
| Table S3b Results of AUROC analyses for 90-day mortality.....                                          | 15 |
| Fig. S5a ROC curves at predicting organ failure.....                                                   | 16 |
| Fig. S5b ROC curves at predicting 90-day mortality.....                                                | 17 |
| Table S4 Early versus late deaths.....                                                                 | 18 |
| Table S5 Results of univariable analyses excluding the last six hours' data pre-death.....             | 19 |
| Fig. S6a Mean StO <sub>2</sub> and organ dysfunction excluding the last six hours' data pre-death..... | 20 |
| Fig S6b Mean StO <sub>2</sub> and 90-day mortality excluding the last six hours' data pre-death .....  | 20 |
| Table S6a Additional diagnostic properties for predicting organ dysfunction.....                       | 21 |
| Table S6b Additional diagnostic properties for predicting death at 90 days.....                        | 22 |
| Table S7 Results of logistic regression models excluding the last six hours' data pre-death....        | 23 |
| Table S8 Results of univariable and adjusted models of delta variables.....                            | 24 |
| Fig. S7a Tertiles of delta StO <sub>2</sub> over the first 12 hours and organ dysfunction.....         | 25 |

|                                                                                    |    |
|------------------------------------------------------------------------------------|----|
| Fig. S7b Tertiles of delta StO2 over the first 24 hours and organ dysfunction..... | 25 |
| Fig. S7c Tertiles of delta StO2 over the first 12 hours and 90-day mortality.....  | 26 |
| Fig. S7d Tertiles of delta StO2 over the first 24 hours and 90-day mortality.....  | 26 |
| Table S9 Patient characteristics of sepsis sub-group.....                          | 27 |
| Table S10 Results of univariable analyses for sepsis sub-group.....                | 28 |
| Table S11 Results of logistic regression models for sepsis sub-group.....          | 30 |
| Table S12 Reported problems in NIRS-monitoring.....                                | 31 |
| References.....                                                                    | 32 |

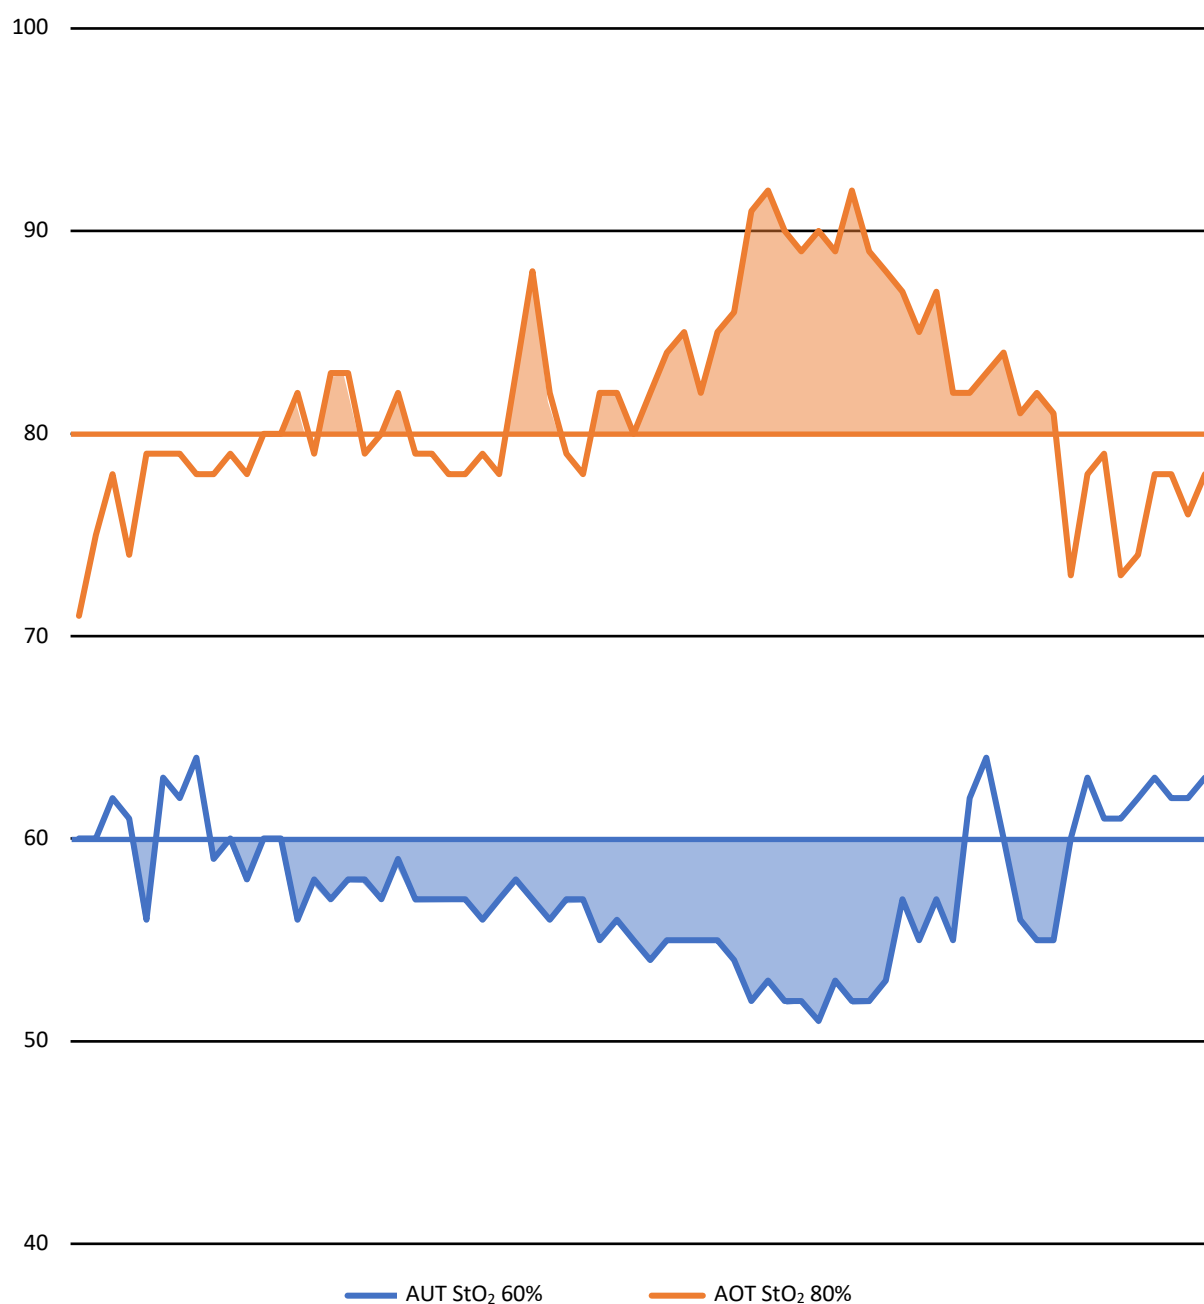

**Fig. S1** Visual presentation of calculations of area under the curve, below and above specific StO<sub>2</sub> thresholds. The areas under threshold (AUT; StO<sub>2</sub> [%] x time [minutes]) below the three prespecified StO<sub>2</sub> thresholds (60%, 50% and 40%) were calculated as follows: All StO<sub>2</sub> values exceeding the threshold value were excluded from the data. The threshold value was then subtracted from the patient StO<sub>2</sub> values and an area under the curve was calculated for the inverse of the differences. Post hoc, we also decided to calculate area over threshold (AOT) above StO<sub>2</sub> 80% in similar manner.

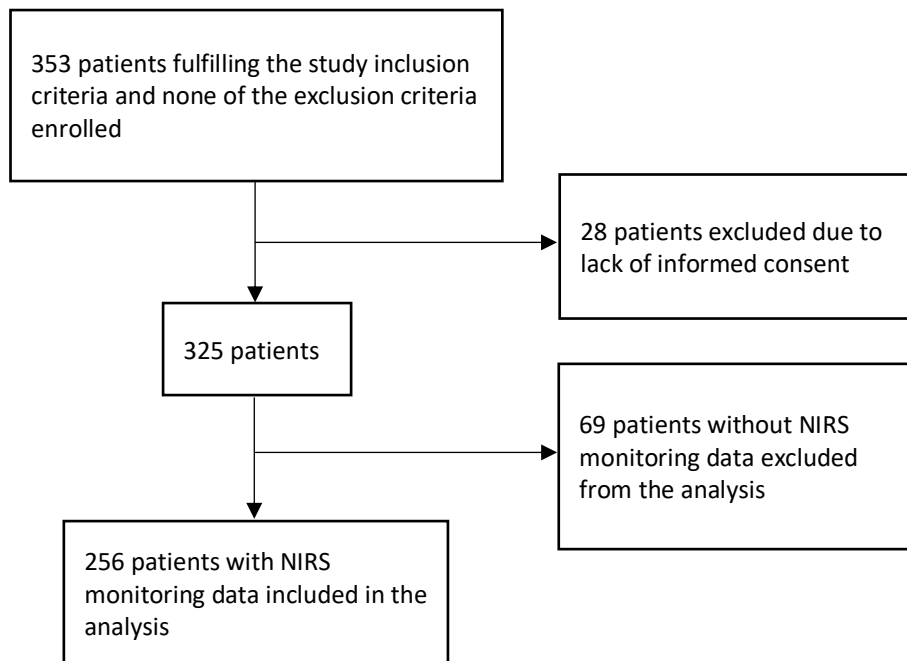

**Fig. S2** Study Flowchart. During the enrollment period from April 2019 to May 2023 the enrollment was paused due to the COVID-19 pandemic from 30 March 2020 to 31 May 2020 and from 28 February 2021 to 19 April 2021

**Table S1** Additional patient characteristics

|                                                              |              |                       | Organ dysfunction       |                            |        | 90-day mortality        |                            |        |
|--------------------------------------------------------------|--------------|-----------------------|-------------------------|----------------------------|--------|-------------------------|----------------------------|--------|
|                                                              | Missing<br>n | All patients<br>n=256 | SOFA-improvers<br>n=171 | SOFA-non-improvers<br>n=85 | p      | 90-d survivors<br>n=187 | 90-d non-survivors<br>n=69 | p      |
| <b>Number of signs of tissue hypoperfusion at enrollment</b> | 0            | 2 (2; 3)              | 2 (1; 3)                | 3 (2; 4)                   | 0.194  | 2 (1; 3)                | 3 (2; 4)                   | 0.001  |
| 0                                                            |              | 18 (7.0)              | 14 (8.2)                | 4 (4.7)                    | 0.766  | 16 (8.6)                | 2 (2.9)                    | 0.051  |
| 1                                                            |              | 43 (16.8)             | 30 (17.5)               | 13 (15.3)                  |        | 34 (18.2)               | 9 (13.0)                   |        |
| 2                                                            |              | 79 (30.9)             | 54 (31.6)               | 25 (29.4)                  |        | 63 (33.7)               | 16 (23.2)                  |        |
| 3                                                            |              | 54 (21.1)             | 34 (19.9)               | 20 (23.5)                  |        | 37 (19.8)               | 17 (24.6)                  |        |
| 4                                                            |              | 46 (18.0)             | 29 (17.0)               | 17 (20.0)                  |        | 28 (15.0)               | 18 (26.1)                  |        |
| 5                                                            |              | 13 (5.1)              | 9 (5.3)                 | 4 (4.7)                    |        | 8 (4.3)                 | 5 (7.2)                    |        |
| 6                                                            |              | 3 (1.2)               | 1 (0.6)                 | 2 (2.4)                    |        | 1 (0.5)                 | 2 (2.9)                    |        |
| <b>Body Mass Index (kg/m2)</b>                               | 3            | 26.6 (23.0-31.2)      | 26.5 (23.1-31.1)        | 26.7 (22.9-31.9)           | 0.935  | 26.9 (23.0-31.2)        | 26.1 (22.8-31.2)           | 0.603  |
| <b>Admission type surgical</b>                               | 0            | 129 (50.4)            | 85 (49.7)               | 44 (51.8)                  | 0.792  | 92 (49.2)               | 37 (53.6)                  | 0.574  |
| <b><u>Vasoactive medication</u></b>                          |              |                       |                         |                            |        |                         |                            |        |
| Norepinephrine                                               | 0            | 256 (100.0)           | 171 (100.0)             | 85 (100.0)                 | -      | 187 (100.0)             | 69 (100.0)                 | -      |
| Epinephrine                                                  | 3            | 7 (2.8)               | 4 (2.4)                 | 3 (3.6)                    | 0.688  | 5 (2.7)                 | 2 (2.9)                    | 1.000  |
| Levosimendan                                                 | 3            | 18 (7.1)              | 13 (7.7)                | 5 (6.0)                    | 0.796  | 13 (7.0)                | 5 (7.3)                    | 1.000  |
| Vasopressin                                                  | 3            | 3 (1.2)               | 2 (1.2)                 | 1 (1.2)                    | 1.000  | 2 (1.1)                 | 1 (1.5)                    | 1.000  |
| Dobutamine                                                   | 3            | 8 (3.2)               | 3 (1.8)                 | 5 (6.0)                    | 0.121  | 3 (1.6)                 | 5 (7.4)                    | 0.035  |
| Dopamine                                                     | 3            | 10 (4.0)              | 8 (4.7)                 | 2 (2.4)                    | 0.504  | 9 (4.9)                 | 1 (1.5)                    | 0.296  |
| <b><u>AKI and RRT</u></b>                                    |              |                       |                         |                            |        |                         |                            |        |
| AKI                                                          | 0            | 167 (65.2)            | 103 (60.2)              | 64 (75.3)                  | 0.018  | 106 (56.7)              | 61 (88.4)                  | <0.001 |
| AKI duration (days) (in AKI patients)                        | 0            | 3.0 (2.0-5.0)         | 3.0 (2.0-6.0)           | 2.0 (1.0-4.0)              | 0.007  | 3.0 (2.0-5.3)           | 2.0 (2.0-5.0)              | 0.281  |
| AKI max stage (in AKI patients)                              | 0            | 3 (2.0-3.0)           | 3.0 (2.0-3.0)           | 3.0 (2.0-3.0)              | 0.047  | 3.0 (1.0-3.0)           | 3.0 (2.0-3.0)              | 0.045  |
| RRT (CRRT or IHD or both)                                    | 0            | 80 (31.3)             | 39 (22.8)               | 41 (48.2)                  | <0.001 | 45 (24.1)               | 35 (50.7)                  | <0.001 |
| CRRT                                                         | 1            | 68 (26.6)             | 29 (17.0)               | 39 (45.8)                  | <0.001 | 35 (18.7)               | 33 (47.8)                  | <0.001 |
| IHD                                                          | 1            | 20 (7.8)              | 17 (9.9)                | 3 (3.5)                    | 0.086  | 17 (9.1)                | 3 (4.3)                    | 0.296  |
| RRT duration (days)                                          | 0            | 2.0 (2.0-5.0)         | 4.0 (2.0-6.0)           | 2.0 (2.0-4.5)              | 0.073  | 4.0 (2.0-5.0)           | 2.0 (2.0-5.0)              | 0.183  |
| SOFA change from day 1 to day 7 or ICU discharge             | 2            | -2 (-5; 0)            | -4 (-6; -2)             | 0 (0; 1)                   | 0.000  | -3 (-5; -1)             | 0 (-2; 1)                  | <0.001 |

|                  |    |                 |                |                 |        |                |                 |        |
|------------------|----|-----------------|----------------|-----------------|--------|----------------|-----------------|--------|
| Daily SOFA score |    |                 |                |                 |        |                |                 |        |
| day 1 (n=256)    | 2  | 10.0 (8.0-13.0) | 9.0 (8.0-12.0) | 10.0 (7.0-13.0) | 0.126  | 9.0 (7.0-11.0) | 13.0 (9.0-15.0) | <0.001 |
| day 2 (n=240)    | 16 | 9.0 (7.0-12.0)  | 8.0 (6.0-11.0) | 11.0 (9.0-15.0) | <0.001 | 8.0 (6.0-11.0) | 12.0 (9.0-15.0) | <0.001 |
| day 3 (n=185)    | 13 | 8.0 (6.0-11.0)  | 8.0 (5.0-10.5) | 11.0 (9.0-15.0) | <0.001 | 8.0 (6.0-11.0) | 11.0 (9.0-14.0) | <0.001 |
| day 4 (n=153)    | 16 | 8.0 (5.0-11.0)  | 7.0 (5.0-10.0) | 12.5 (9.8-16.0) | <0.001 | 7.0 (4.0-10.0) | 11.0 (9.0-14.0) | <0.001 |
| day 5 (n=132)    | 13 | 8.0 (5.0-11.0)  | 7.0 (4.0-10.0) | 13.0 (9.0-15.0) | <0.001 | 6.0 (4.0-10.0) | 10.5 (9.0-13.8) | <0.001 |
| day 6 (n=106)    | 16 | 8.0 (5.0-11.0)  | 7.0 (4.0-10.5) | 12.0 (8.5-16.0) | <0.001 | 7.0 (4.0-11.0) | 11.0 (7.8-14.5) | <0.001 |
| day 7 (n=84)     | 10 | 7.0 (5.0-11.0)  | 7.0 (5.0-9.5)  | 12.0 (8.0-15.0) | <0.001 | 7.0 (5.0-10.0) | 9.5 (7.0-14.0)  | 0.006  |

Continuous variables are summarized as medians with interquartile ranges (IQR), categorical variables as counts and percentages.

Organ dysfunction was defined as unchanged or worsening SOFA score or death within 7 days in intensive care unit.

Abbreviations: SOFA-improvers, patients whose SOFA score decreased during the 7 day follow-up; SOFA-non-improvers, patients whose SOFA score stayed the same or increased, or who died during the 7-day follow-up; SOFA, Sequential Organ Failure Assessment; ICU, intensive care unit; AKI, Acute Kidney Injury, defined by Kidney Disease Improving Global Outcomes (KDIGO) Clinical Practice Guidelines [1]; RRT, Renal Replacement Therapy; CRRT, Continuous Renal Replacement Therapy; IHD, Intermittent Hemodialysis.

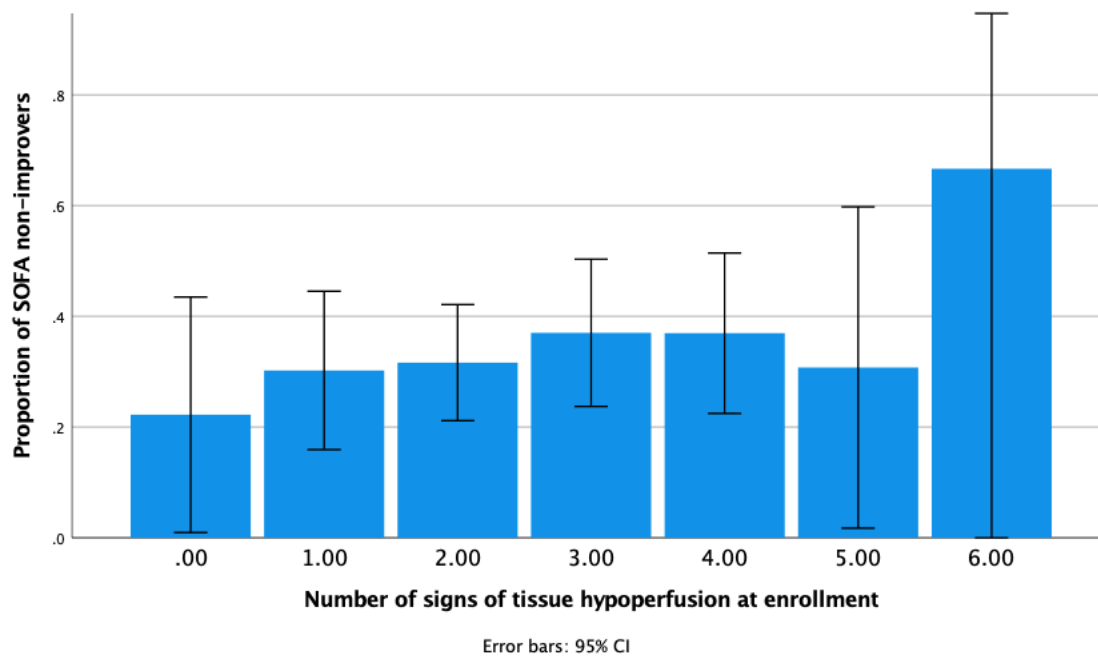

**Fig. S3a** Proportion of SOFA non-improvers and number of signs of tissue hypoperfusion at study enrollment. Abbreviations: SOFA, Sequential Organ Failure Assessment; SOFA-non-improvers, patients whose SOFA score stayed the same or increased, or who died during the 7-day follow-up.

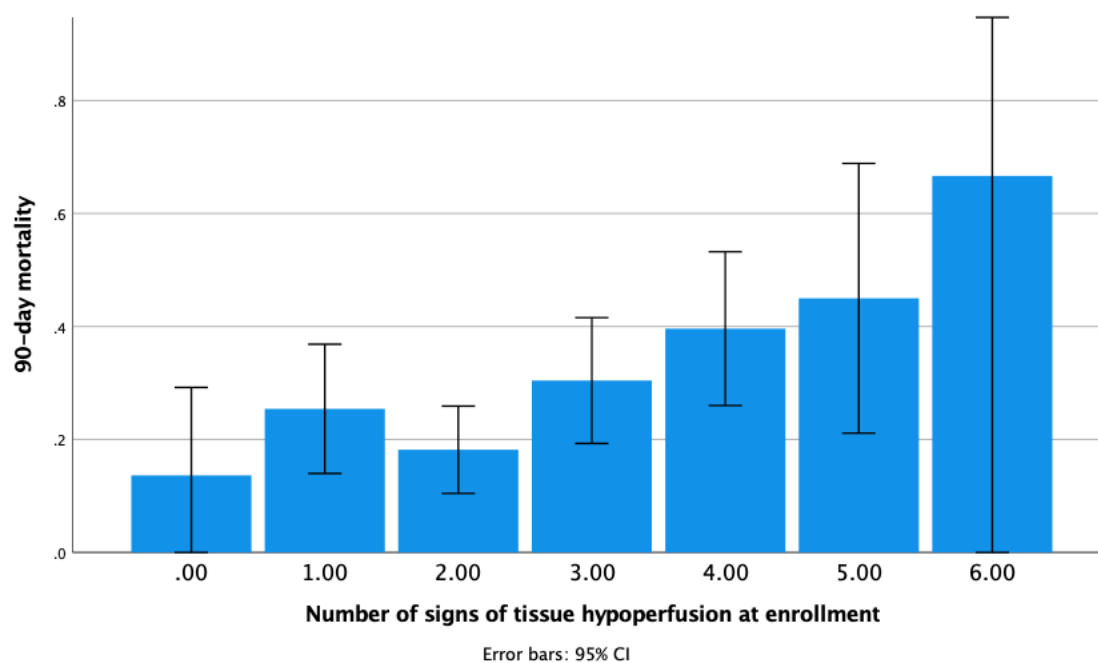

**Fig. S3b** 90-day mortality and number of signs of tissue hypoperfusion at study enrollment.



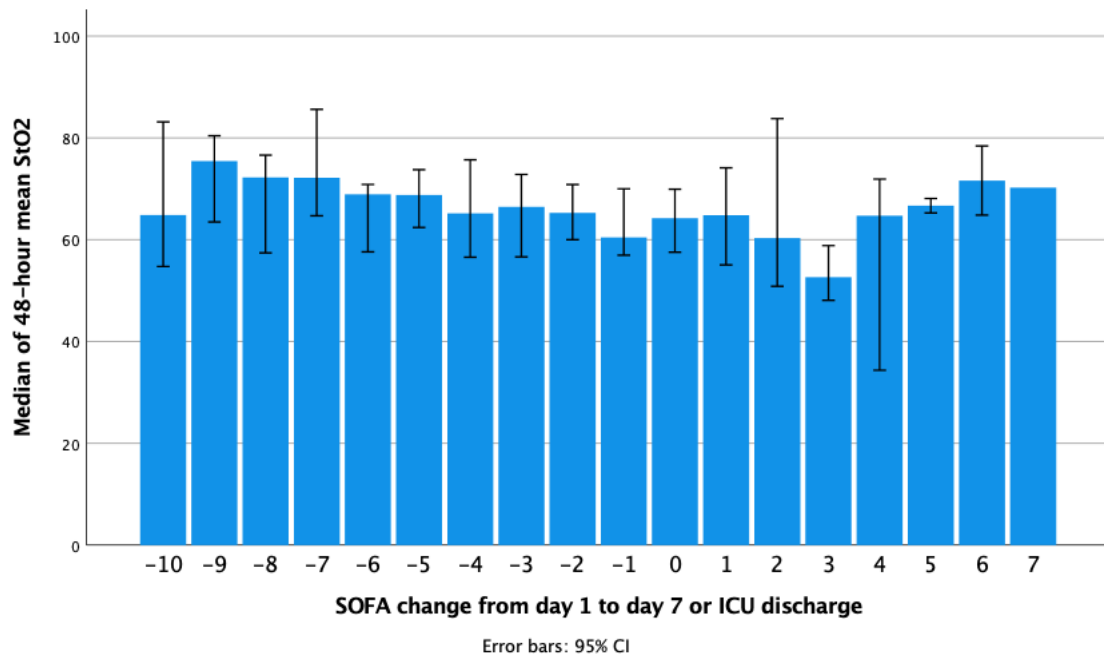

**Fig. S4** Median of 48-hour mean StO<sub>2</sub> and SOFA change from day 1 to day 7 or ICU discharge.  
Abbreviations: StO<sub>2</sub>, tissue oxygen saturation; SOFA, Sequential Organ Failure Assessment; ICU, intensive care unit.

**Table S2a** Results of univariable analyses for organ dysfunction, additional time-intervals and parameters.

|                                                        |           | Organ dysfunction       |                            |        |
|--------------------------------------------------------|-----------|-------------------------|----------------------------|--------|
|                                                        | Missing n | SOFA-improvers<br>n=171 | SOFA-non-improvers<br>n=85 | p      |
| <b>Mean arterial pressure (mmHg)</b>                   |           |                         |                            |        |
| 0-6 h                                                  | 3         | 71.1 (66.6-76.3)        | 70.3 (64.1-73.2)           | 0.072  |
| 0-24 h                                                 | 3         | 72.9 (68.6-76.5)        | 69.3 (65.0-73.6)           | 0.073  |
| <b>Heart rate (bpm)</b>                                |           |                         |                            |        |
| 0-6 h                                                  | 3         | 93.5 (79.4-107.9)       | 95.7 (79.7-110.8)          | 0.629  |
| 0-24 h                                                 | 3         | 91.2 (78.7-103.2)       | 94.3 (80.7-109.2)          | 0.511  |
| <b>Norepinephrine dose (µg/kg/min)<sup>a</sup></b>     |           |                         |                            |        |
| 0-6 h                                                  | 4         | 0.18 (0.11-0.35)        | 0.25 (0.12-0.49)           | 0.032  |
| 0-24 h                                                 | 4         | 0.14 (0.08-0.31)        | 0.27 (0.08-0.55)           | 0.004  |
| <b>Arterial lactate (mmol/l)</b>                       |           |                         |                            |        |
| 0-6 h                                                  | 13        | 2.4 (1.5-4.3)           | 3.3 (1.7-5.8)              | 0.026  |
| 0-24 h                                                 | 12        | 1.9 (1.3-3.3)           | 3.3 (1.5-5.5)              | <0.001 |
| <b>Capillary refill time (s)</b>                       |           |                         |                            |        |
| 0-6 h                                                  | 2         | 5.4 (3.4-8.9)           | 6.3 (3.2-9.8)              | 0.612  |
| 0-24 h                                                 | 0         | 5.1 (3.2-8.2)           | 6.8 (3.2-12.1)             | 0.040  |
| <b>Mottling score</b>                                  |           |                         |                            |        |
| 0-6 h                                                  | 1         | 0.0 (0.0-1.0)           | 0.0 (0.0-1.0)              | 0.931  |
| 0-24 h                                                 | 0         | 0.0 (0.0-0.4)           | 0.1 (0.0-0.9)              | 0.050  |
| <b>Peripheral temperature (°C)</b>                     |           |                         |                            |        |
| 0-6 h                                                  | 6         | 31.9 (30.4-33.4)        | 31.9 (29.9-33.2)           | 0.404  |
| 0-24 h                                                 | 1         | 32.8 (31.3-33.8)        | 32.3 (30.7-33.6)           | 0.141  |
| <b>Central to peripheral temperature gradient (°C)</b> |           |                         |                            |        |
| 0-6 h                                                  | 20        | 4.7 (3.2-6.6)           | 4.4 (2.3-6.4)              | 0.328  |
| 0-24 h                                                 | 7         | 4.4 (2.7-5.9)           | 3.9 (2.4-5.6)              | 0.440  |
| <b>Mean Peripheral StO<sub>2</sub> (%)</b>             |           |                         |                            |        |
| 0-6 h                                                  | 4         | 64.6 (54.2-73.1)        | 63.6 (55.0-71.8)           | 0.711  |
| 0-24 h                                                 | 2         | 66.9 (55.9-73.6)        | 62.8 (53.5-70.8)           | 0.105  |
| <b>AUT below StO<sub>2</sub> thresholds (%min)</b>     |           |                         |                            |        |
| <b>60 %</b>                                            |           |                         |                            |        |
| 0-6 h                                                  | 0         | 86.3 (0.0-2039.3)       | 192 (0.0-1607.8)           | 0.925  |
| 0-24 h                                                 | 0         | 661.5 (0.0-6635.3)      | 850.8 (0.4-8071.1)         | 0.536  |
| <b>50 %</b>                                            |           |                         |                            |        |
| 0-6 h                                                  | 0         | 0.0 (0.0-233.8)         | 0.0 (0.0-174.9)            | 0.855  |
| 0-24 h                                                 | 0         | 4.5 (0.0-809.0)         | 0.0 (0.0 to 1870.3)        | 0.912  |
| <b>40 %</b>                                            |           |                         |                            |        |
| 0-6 h                                                  | 0         | 0.0 (0.0-0.0)           | 0.0 (0.0-0.0)              | 0.787  |
| 0-24 h                                                 | 0         | 0.0 (0.0-25.3)          | 0.0 (0.0-144.0)            | 0.357  |
| <b>AOT above StO<sub>2</sub> 80 % (%min)</b>           |           |                         |                            |        |
| 0-6 h                                                  | 0         | 0.0 (0.0-0.0)           | 0.0 (0.0-0.0)              | 0.332  |
| 0-24 h                                                 | 0         | 0.0 (0.0-418.5)         | 0.0 (0.0-26.0)             | 0.039  |
| <b>Time below StO<sub>2</sub> thresholds (min)</b>     |           |                         |                            |        |
| <b>60 %</b>                                            |           |                         |                            |        |
| 0-6 h                                                  | 4         | 37.8 (0.0-268.1)        | 46.0 (0.0-182.4)           | 0.744  |
| 0-24 h                                                 | 2         | 118.5 (0.0-885.1)       | 259.8 (0.63-811.6)         | 0.789  |
| <b>50 %</b>                                            |           |                         |                            |        |
| 0-6 h                                                  | 4         | 0.0 (0.0-51.4)          | 0.0 (0.0-52.5)             | 0.805  |
| 0-24 h                                                 | 2         | 0.5 (0.0-193.6)         | 0.0 (0.0-287.9)            | 0.927  |
| <b>40 %</b>                                            |           |                         |                            |        |
| 0-6 h                                                  | 4         | 0.0 (0.0-0.0)           | 0.0 (0.0-0.0)              | 0.556  |
| 0-24 h                                                 | 2         | 0.0 (0.0-2.9)           | 0.0 (0.0-14.5)             | 0.660  |
| <b>Time above StO<sub>2</sub> 80 % (min)</b>           |           |                         |                            |        |

|                                                                                     |   |                  |                  |        |
|-------------------------------------------------------------------------------------|---|------------------|------------------|--------|
| <b>0-6 h</b>                                                                        | 4 | 0.0 (0.0-0.0)    | 0.0 (0.0-0.0)    | 0.363  |
| <b>0-24 h</b>                                                                       | 2 | 0.0 (0.0-95.3)   | 0.0 (0.0-11.5)   | 0.046  |
| <b>AUT below StO<sub>2</sub> thresholds divided by the length of follow-up (%)</b>  |   |                  |                  |        |
| <b>60 %</b>                                                                         |   |                  |                  |        |
| <b>0-6 h</b>                                                                        | 0 | 0.34 (0.00-6.08) | 0.57 (0.00-4.95) | 0.976  |
| <b>0-24 h</b>                                                                       | 0 | 0.52 (0.00-5.01) | 0.65 (0.00-6.94) | 0.387  |
| <b>0-48 h</b>                                                                       | 1 | 0.77 (0.02-4.67) | 1.07 (0.03-8.79) | 0.158  |
| <b>50 %</b>                                                                         |   |                  |                  |        |
| <b>0-6 h</b>                                                                        | 0 | 0.00 (0.00-0.68) | 0.00 (0.00-0.95) | 0.892  |
| <b>0-24 h</b>                                                                       | 0 | 0.00 (0.00-0.64) | 0.00 (0.00-1.80) | 0.806  |
| <b>0-48 h</b>                                                                       | 1 | 0.02 (0.00-0.81) | 0.06 (0.00-2.36) | 0.407  |
| <b>40 %</b>                                                                         |   |                  |                  |        |
| <b>0-6 h</b>                                                                        | 0 | 0.00 (0.00-0.00) | 0.00 (0.00-0.00) | 0.795  |
| <b>0-24 h</b>                                                                       | 0 | 0.00 (0.00-0.02) | 0.00 (0.00-0.13) | 0.322  |
| <b>0-48 h</b>                                                                       | 1 | 0.00 (0.00-0.10) | 0.00 (0.00-0.36) | 0.153  |
| <b>AOT above StO<sub>2</sub> 80 % divided by the length of follow-up (%)</b>        |   |                  |                  |        |
| <b>0-6 h</b>                                                                        | 0 | 0.00 (0.00-0.00) | 0.00 (0.00-0.00) | 0.324  |
| <b>0-24 h</b>                                                                       | 0 | 0.00 (0.00-0.38) | 0.00 (0.00-0.02) | 0.036  |
| <b>0-48 h</b>                                                                       | 1 | 0.02 (0.00-0.70) | 0.00 (0.00-0.04) | <0.001 |
| <b>Time below StO<sub>2</sub> thresholds divided by the length of follow-up (%)</b> |   |                  |                  |        |
| <b>60 %</b>                                                                         |   |                  |                  |        |
| <b>0-6 h</b>                                                                        | 4 | 12.5 (0.0-91.9)  | 15.9 (0.0-85.0)  | 0.927  |
| <b>0-24 h</b>                                                                       | 2 | 9.9 (0.0-68.5)   | 19.0 (0.1-81.8)  | 0.391  |
| <b>0-48 h</b>                                                                       | 1 | 8.7 (0.3-58.6)   | 21.1 (1.3-80.9)  | 0.114  |
| <b>50 %</b>                                                                         |   |                  |                  |        |
| <b>0-6 h</b>                                                                        | 4 | 0.0 (0.0-16.6)   | 0.0 (0.0-20.2)   | 0.823  |
| <b>0-24 h</b>                                                                       | 2 | 0.0 (0.0-14.5)   | 0.0 (0.0-26.8)   | 0.905  |
| <b>0-48 h</b>                                                                       | 1 | 0.2 (0.0-12.5)   | 0.5 (0.0-33.6)   | 0.431  |
| <b>40 %</b>                                                                         |   |                  |                  |        |
| <b>0-6 h</b>                                                                        | 4 | 0.0 (0.0-0.0)    | 0.0 (0.0-0.0)    | 0.569  |
| <b>0-24 h</b>                                                                       | 2 | 0.0 (0.0-0.3)    | 0.0 (0.0-1.3)    | 0.598  |
| <b>0-48 h</b>                                                                       | 1 | 0.0 (0.0-0.8)    | 0.0 (0.0-5.1)    | 0.289  |
| <b>Time above StO<sub>2</sub> 80 % divided by the length of follow-up (%)</b>       |   |                  |                  |        |
| <b>0-6 h</b>                                                                        | 4 | 0.0 (0.0-0.0)    | 0.0 (0.0-0.0)    | 0.341  |
| <b>0-24 h</b>                                                                       | 2 | 0.0 (0.0-7.7)    | 0.0 (0.0-1.0)    | 0.046  |
| <b>0-48 h</b>                                                                       | 1 | 0.6 (0.0-18.7)   | 0.0 (0.0-2.3)    | 0.001  |

All continuous parameters are summarized as medians and interquartile ranges (IQR).

Organ dysfunction was defined as unchanged or worsening SOFA score or death within 7 days in intensive care unit.

Abbreviations: StO<sub>2</sub>, tissue oxygen saturation; SOFA, Sequential Organ Failure Assessment; h, hour; SOFA-improvers, patients whose SOFA score decreased during the 7 day follow-up; SOFA-non-improvers, patients whose SOFA score stayed the same or increased, or who died during the 7-day follow-up; mmHg, millimeters of mercury; bpm, beats per minute; µg/kg/min, micrograms per kilogram per minute; mmol/l, millimoles per liter; s, seconds; °C, degrees of Celsius; AUT, area under StO<sub>2</sub> threshold; AOT, area over StO<sub>2</sub> threshold; min, minutes.

<sup>a</sup> Norepinephrine tartrate

**Table S2b** Results of univariable analyses for 90-day mortality, additional time-intervals and parameters

|                                                        |              | 90-day mortality          |                              |        |
|--------------------------------------------------------|--------------|---------------------------|------------------------------|--------|
|                                                        | missing<br>n | 90-day survivors<br>n=187 | 90-day non-survivors<br>n=69 | p      |
| <b>Mean arterial pressure (mmHg)</b>                   |              |                           |                              |        |
| 0-6 h                                                  | 3            | 71.2 (66.9-76.5)          | 69.0 (62.6-72.8)             | 0.002  |
| 0-24 h                                                 | 3            | 72.7 (68.9-76.6)          | 67.6 (62.5-73.0)             | 0.001  |
| <b>Heart rate (bpm)</b>                                |              |                           |                              |        |
| 0-6 h                                                  | 3            | 93.0 (77.4-107.1)         | 97.7 (80.9-114.5)            | 0.084  |
| 0-24 h                                                 | 3            | 91.0 (77.6-102.6)         | 96.1 (83.4-109.9)            | 0.057  |
| <b>Norepinephrine dose (µg/kg/min)<sup>a</sup></b>     |              |                           |                              |        |
| 0-6 h                                                  | 4            | 0.17 (0.11-0.35)          | 0.32 (0.13-0.56)             | <0.001 |
| 0-24 h                                                 | 4            | 0.14 (0.07-0.30)          | 0.31 (0.13-0.60)             | <0.001 |
| <b>Arterial lactate (mmol/l)</b>                       |              |                           |                              |        |
| 0-6 h                                                  | 13           | 2.2 (1.4-3.9)             | 4.2 (2.7-6.7)                | <0.001 |
| 0-24 h                                                 | 12           | 1.8 (1.2-3.0)             | 4.1 (2.4-6.6)                | <0.001 |
| <b>Capillary refill time (s)</b>                       |              |                           |                              |        |
| 0-6 h                                                  | 2            | 5.2 (3.2-8.4)             | 7.4 (3.6-11.7)               | 0.022  |
| 0-24 h                                                 | 0            | 5.0 (3.0-7.8)             | 8.5 (4.4-14.7)               | <0.001 |
| <b>Mottling score</b>                                  |              |                           |                              |        |
| 0-6 h                                                  | 1            | 0.0 (0.0-0.7)             | 0.4 (0.0-1.5)                | <0.001 |
| 0-24 h                                                 | 0            | 0.0 (0.0-0.3)             | 0.4 (0.0-1.6)                | <0.001 |
| <b>Peripheral temperature (°C)</b>                     |              |                           |                              |        |
| 0-6 h                                                  | 6            | 31.9 (30.4-33.4)          | 31.5 (30.0-33.3)             | 0.118  |
| 0-24 h                                                 | 1            | 32.6 (31.1-33.9)          | 32.2 (31.0-33.7)             | 0.284  |
| <b>Central to peripheral temperature gradient (°C)</b> |              |                           |                              |        |
| 0-6 h                                                  | 20           | 4.7 (3.1-6.6)             | 4.3 (2.6-6.1)                | 0.420  |
| 0-24 h                                                 | 7            | 4.3 (2.8-5.8)             | 3.9 (2.5-5.7)                | 0.421  |
| <b>Mean Peripheral StO<sub>2</sub> (%)</b>             |              |                           |                              |        |
| 0-6 h                                                  | 4            | 65.2 (55.5-73.5)          | 61.3 (50.8-69.2)             | 0.027  |
| 0-24 h                                                 | 2            | 68.4 (57.7-73.7)          | 61.8 (49.2-67.8)             | <0.001 |
| <b>AUT below StO<sub>2</sub> thresholds (%min)</b>     |              |                           |                              |        |
| <b>60 %</b>                                            |              |                           |                              |        |
| 0-6 h                                                  | 0            | 60.8 (0.0-1658.3)         | 343.0 (0.0-2939.9)           | 0.022  |
| 0-24 h                                                 | 0            | 324.5 (0.0-6539.0)        | 2468.3 (236.3-11900.9)       | <0.001 |
| <b>50 %</b>                                            |              |                           |                              |        |
| 0-6 h                                                  | 0            | 0.0 (0.0-97.5)            | 0.0 (0.0-576.9)              | 0.053  |
| 0-24 h                                                 | 0            | 0.0 (0.0-714.0)           | 304.8 (0.0-3775.1)           | 0.012  |
| <b>40 %</b>                                            |              |                           |                              |        |
| 0-6 h                                                  | 0            | 0.0 (0.0-0.0)             | 0.0 (0.0-47.1)               | 0.026  |
| 0-24 h                                                 | 0            | 0.0 (0.0-6.0)             | 0.0 (0.0-534.1)              | 0.008  |
| <b>AOT above StO<sub>2</sub> 80 % (%min)</b>           |              |                           |                              |        |
| 0-6 h                                                  | 0            | 0.0 (0.0-0.0)             | 0.0 (0.0-0.0)                | 0.107  |
| 0-24 h                                                 | 0            | 0.0 (0.0-524.0)           | 0.0 (0.0-0.0)                | <0.001 |
| <b>Time below StO<sub>2</sub> thresholds (min)</b>     |              |                           |                              |        |
| <b>60 %</b>                                            |              |                           |                              |        |
| 0-6 h                                                  | 4            | 18.0 (0.0-211.8)          | 116.0 (0.0-287.0)            | 0.033  |
| 0-24 h                                                 | 2            | 81.0 (0.0-813.0)          | 472.5 (55.5-880.1)           | 0.005  |
| <b>50 %</b>                                            |              |                           |                              |        |
| 0-6 h                                                  | 4            | 0.0 (0.0-34.0)            | 0.0 (0.0-138)                | 0.082  |
| 0-24 h                                                 | 2            | 0.0 (0.0-146.0)           | 36.8 (0.0-443.9)             | 0.015  |
| <b>40 %</b>                                            |              |                           |                              |        |
| 0-6 h                                                  | 4            | 0.0 (0.0-0.0)             | 0.0 (0.0-6.5)                | 0.022  |
| 0-24 h                                                 | 2            | 0.0 (0.0-1.1)             | 0.0 (0.0-115.0)              | 0.013  |
| <b>Time above StO<sub>2</sub> 80 % (min)</b>           |              |                           |                              |        |

|                                                                                     |   |                  |                   |        |
|-------------------------------------------------------------------------------------|---|------------------|-------------------|--------|
| 0-6 h                                                                               | 4 | 0.0 (0.0-0.3)    | 0.0 (0.0-0.0)     | 0.112  |
| 0-24 h                                                                              | 2 | 0.0 (0.0-102.8)  | 0.0 (0.0-0.0)     | <0.001 |
| <b>AUT below StO<sub>2</sub> thresholds divided by the length of follow-up (%)</b>  |   |                  |                   |        |
| <b>60 %</b>                                                                         |   |                  |                   |        |
| 0-6 h                                                                               |   |                  |                   |        |
| 0-24 h                                                                              | 0 | 0.24 (0.00-5.48) | 1.07 (0.00-10.99) | 0.016  |
| 0-48 h                                                                              | 0 | 0.25 (0.00-4.56) | 1.89 (0.21-12.01) | <0.001 |
| <b>50 %</b>                                                                         |   |                  |                   |        |
| 0-6 h                                                                               | 1 | 0.34 (0.00-4.01) | 2.73 (0.42-11.28) | <0.001 |
| 0-24 h                                                                              | 0 | 0.00 (0.00-0.29) | 0.00 (0.00-1.70)  | 0.052  |
| 0-48 h                                                                              | 0 | 0.00 (0.00-0.53) | 0.22 (0.00-3.64)  | 0.009  |
| <b>40 %</b>                                                                         |   |                  |                   |        |
| 0-6 h                                                                               | 1 | 0.01 (0.00-0.66) | 0.31 (0.00-4.37)  | <0.001 |
| 0-24 h                                                                              | 0 | 0.00 (0.00-0.00) | 0.00 (0.00-0.15)  | 0.028  |
| 0-48 h                                                                              | 0 | 0.00 (0.00-0.05) | 0.00 (0.00-0.45)  | 0.007  |
|                                                                                     | 1 | 0.00 (0.00-0.07) | 0.01 (0.00-0.91)  | <0.001 |
| <b>AOT above StO<sub>2</sub> 80 % divided by the length of follow-up (%)</b>        |   |                  |                   |        |
| 0-6 h                                                                               | 0 | 0.00 (0.00-0.00) | 0.00 (0.00-0.00)  | 0.106  |
| 0-24 h                                                                              | 0 | 0.00 (0.00-0.48) | 0.00 (0.00-0.00)  | <0.001 |
| 0-48 h                                                                              | 1 | 0.02 (0.00-0.71) | 0.00 (0.00-0.01)  | <0.001 |
| <b>Time below StO<sub>2</sub> thresholds divided by the length of follow-up (%)</b> |   |                  |                   |        |
| <b>60 %</b>                                                                         |   |                  |                   |        |
| 0-6 h                                                                               | 4 | 6.4 (0.0-77.1)   | 48.1 (0.0-100.0)  | 0.020  |
| 0-24 h                                                                              | 2 | 7.8 (0.0-62.7)   | 35.3 (5.1-91.8)   | 0.001  |
| 0-48 h                                                                              | 1 | 6.8 (0.2-53.6)   | 37.7 (6.9-88.0)   | <0.001 |
| <b>50 %</b>                                                                         |   |                  |                   |        |
| 0-6 h                                                                               | 4 | 0.0 (0.0-9.9)    | 0.0 (0.0-41.1)    | 0.082  |
| 0-24 h                                                                              | 2 | 0.0 (0.0-11.8)   | 2.7 (0.0-39.9)    | 0.010  |
| 0-48 h                                                                              | 1 | 0.1 (0.0-9.7)    | 8.1 (0.0-41.3)    | <0.001 |
| <b>40 %</b>                                                                         |   |                  |                   |        |
| 0-6 h                                                                               | 4 | 0.0 (0.0-0.0)    | 0.0 (0.0-1.9)     | 0.023  |
| 0-24 h                                                                              | 2 | 0.0 (0.0-0.1)    | 0.0 (0.0-10.6)    | 0.011  |
| 0-48 h                                                                              | 1 | 0.0 (0.0-0.5)    | 0.1 (0.0-10.4)    | <0.001 |
| <b>Time above StO<sub>2</sub> 80 % divided by the length of follow-up (%)</b>       |   |                  |                   |        |
| 0-6 h                                                                               | 4 | 0.0 (0.0-0.1)    | 0.0 (0.0-0.0)     | 0.108  |
| 0-24 h                                                                              | 2 | 0.0 (0.0-8.7)    | 0.0 (0.0-0.0)     | <0.001 |
| 0-48 h                                                                              | 1 | 0.9 (0.0-18.8)   | 0.0 (0.0-0.3)     | <0.001 |

All continuous parameters are summarized as medians and interquartile ranges (IQR).

abbreviations: StO<sub>2</sub>, tissue oxygen saturation; mmHg, millimeters of mercury; bpm, beats per minute; µg/kg/min, micrograms per kilogram per minute; mmol/l, millimoles per liter; s, seconds; °C, degrees of Celsius; AUT, area under StO<sub>2</sub> threshold; AOT, area over StO<sub>2</sub> threshold; min, minutes.

<sup>a</sup> Norepinephrine tartrate

**Table S3a** Results of AUROC analyses for organ dysfunction

| Parameters                                                 | missing n | AUROC (95% CI)   |
|------------------------------------------------------------|-----------|------------------|
| SOFA -score 0-24 h                                         | 2         | 0.56 (0.48-0.64) |
| SAPS II 0-24 h                                             | 3         | 0.60 (0.52-0.68) |
| APACHE 0-24 h                                              | 3         | 0.56 (0.49-0.64) |
| Mean arterial pressure (mmHg), 0-48 h *                    | 3         | 0.71 (0.64-0.78) |
| Heart rate (bpm), 0-48 h                                   | 3         | 0.57 (0.48-0.64) |
| Norepinephrine dose (µg/kg/min), 0-48 h                    | 4         | 0.65 (0.57-0.73) |
| Arterial lactate (mmol/l), 0-48 h                          | 12        | 0.68 (0.60-0.76) |
| Capillary refill time (s), 0-48 h                          | 0         | 0.61 (0.53-0.68) |
| Mottling score, 0-48 h                                     | 0         | 0.58 (0.50-0.66) |
| Peripheral temperature (°C), 0-48 h *                      | 1         | 0.57 (0.50-0.65) |
| Central to peripheral temperature gradient (°C), 0-48 h    | 6         | 0.50 (0.42-0.58) |
| Mean Peripheral StO <sub>2</sub> (%), 0-48 h *             | 1         | 0.59 (0.52-0.66) |
| <u>AUT below StO<sub>2</sub> thresholds (%min), 0-48 h</u> |           |                  |
| 60 %                                                       | 0         | 0.52 (0.45-0.60) |
| 50 %                                                       | 0         | 0.52 (0.44-0.59) |
| 40 %                                                       | 0         | 0.54 (0.46-0.62) |
| AOT above StO <sub>2</sub> 80 % (%min), 0-48 h *           | 0         | 0.63 (0.56-0.70) |
| <u>Time below StO<sub>2</sub> thresholds (min), 0-48 h</u> |           |                  |
| 60 %                                                       | 1         | 0.51 (0.44-0.59) |
| 50 %                                                       | 1         | 0.51 (0.43-0.59) |
| 40 %                                                       | 1         | 0.53 (0.45-0.61) |
| Time above StO <sub>2</sub> 80 % (min), 0-48 h *           | 1         | 0.62 (0.55-0.69) |
| Logistic regression model 1                                | 12        | 0.78 (0.71-0.84) |
| Logistic regression model 2                                | 12        | 0.78 (0.71-0.84) |

Organ dysfunction was defined as unchanged or worsening SOFA score or death within 7 days in intensive care unit. Abbreviations: AUROC, Area Under Receiver Operating Characteristics Curve; SOFA, Sequential Organ Failure Assessment; h, hour; SAPS II, Simplified Acute Physiology Score; APACHE, Acute Physiology and Chronic Health Evaluation II; mmHg, millimeters of mercury; bpm, beats per minute; µg/kg/min, micrograms per kilogram per minute; mmol/l, millimoles per liter; s, seconds; °C, degrees of Celsius; StO<sub>2</sub>, tissue oxygen saturation; AUT, area under StO<sub>2</sub> threshold; AOT, area over StO<sub>2</sub> threshold; min, minutes.

Variables in the logistic regression models; 48-hour mean capillary refill time; chronic kidney disease (moderate or severe) defined as glomerular filtration rate <60 ml/minute/1.73 m<sup>2</sup> or chronic dialysis at least one week prior to ICU admission; 48-hour mean lactate; 48-hour mean mean arterial pressure; 48-hour mean norepinephrine dose; 24-hour SAPS II score; smoking status (ever smoker); and in MODEL 1: peripheral 48-hour mean StO<sub>2</sub>; or in MODEL 2: 48-hour mean mottling score.

\* In AUROC analysis smaller test result indicates more positive test.

**Table S3b** Results of AUROC analyses for 90-day mortality

| Parameters                                                 | missing n | AUROC (95% CI)   |
|------------------------------------------------------------|-----------|------------------|
| SOFA -score 0-24 h                                         | 2         | 0.76 (0.69-0.82) |
| SAPS II 0-24 h                                             | 3         | 0.80 (0.78-0.85) |
| APACHE 0-24 h                                              | 3         | 0.71 (0.64-0.78) |
| Mean arterial pressure (mmHg), 0-48 h *                    | 3         | 0.75 (0.68-0.82) |
| Heart rate (bpm), 0-48 h                                   | 3         | 0.62 (0.54-0.79) |
| Norepinephrine dose (µg/kg/min), 0-48 h                    | 4         | 0.72 (0.65-0.80) |
| Arterial lactate (mmol/l), 0-48 h                          | 12        | 0.82 (0.76-0.88) |
| Capillary refill time (s), 0-48 h                          | 0         | 0.71 (0.63-0.79) |
| Mottling score, 0-48 h                                     | 0         | 0.72 (0.65-0.80) |
| Peripheral temperature (°C), 0-48 h *                      | 1         | 0.59 (0.51-0.67) |
| Central to peripheral temperature gradient (°C), 0-48 h    | 6         | 0.50 (0.41-0.58) |
| Mean Peripheral StO <sub>2</sub> (%), 0-48 h *             | 1         | 0.67 (0.60-0.75) |
| <u>AUT below StO<sub>2</sub> thresholds</u> (%min), 0-48 h |           |                  |
| 60 %                                                       | 0         | 0.65 (0.57-0.72) |
| 50 %                                                       | 0         | 0.63 (0.55-0.71) |
| 40 %                                                       | 0         | 0.62 (0.54-0.70) |
| AOT above StO <sub>2</sub> 80 % (%min), 0-48 h *           | 0         | 0.68 (0.61-0.75) |
| <u>Time below StO<sub>2</sub> thresholds</u> (min), 0-48 h |           |                  |
| 60 %                                                       | 1         | 0.62 (0.55-0.70) |
| 50 %                                                       | 1         | 0.62 (0.54-0.70) |
| 40 %                                                       | 1         | 0.62 (0.54-0.70) |
| Time above StO <sub>2</sub> 80 % (min), 0-48 h *           | 1         | 0.68 (0.60-0.75) |
| Logistic regression model 1                                | 13        | 0.87 (0.83-0.92) |
| Logistic regression model 2                                | 12        | 0.89 (0.84-0.93) |

AUROC, Area Under Receiver Operating Characteristics Curve; SOFA, Sequential Organ Failure Assessment; h, hour; SAPS II, Simplified Acute Physiology Score; APACHE, Acute Physiology and Chronic Health Evaluation II; mmHg, millimeters of mercury; bpm, beats per minute; µg/kg/min, micrograms per kilogram per minute; mmol/l, millimoles per liter; s, seconds; °C, degrees of Celsius; StO<sub>2</sub>, tissue oxygen saturation; AUT, area under StO<sub>2</sub> threshold; AOT, area over StO<sub>2</sub> threshold; min, minutes.

Variables in the logistic regression models; 48-hour mean capillary refill time; chronic kidney disease (moderate or severe) defined as glomerular filtration rate <60 ml/minute/1.73 m<sup>2</sup> or chronic dialysis at least one week prior to ICU admission; 48-hour mean lactate; 48-hour mean mean arterial pressure; 48-hour mean norepinephrine dose; 24-hour SAPS II score; smoking status (ever smoker); and in MODEL 1: peripheral 48-hour mean StO<sub>2</sub>; or in MODEL 2: 48-hour mean mottling score.

\* In AUROC analysis smaller test result indicates more positive test.

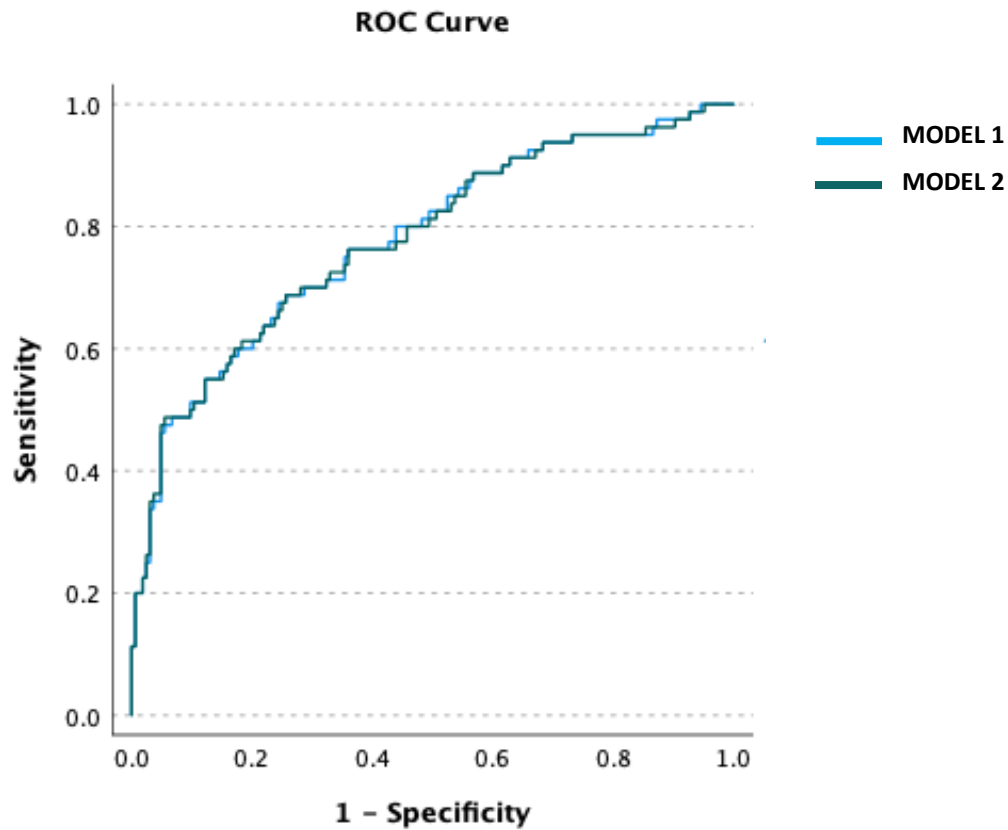

**Fig. S5a** ROC curves of logistic regression models at predicting organ dysfunction. Organ dysfunction was defined as unchanged or worsening SOFA score or death within 7 days in intensive care unit. Variables in the model; 48-hour mean capillary refill time; chronic kidney disease (moderate or severe) defined as glomerular filtration rate  $<60$  ml/minute/ $1.73\text{ m}^2$  or chronic dialysis at least one week prior to ICU admission; 48-hour mean lactate; 48-hour mean mean arterial pressure; 48-hour mean norepinephrine dose; 24-hour SAPS II score; smoking status (ever smoker); and in MODEL 1: peripheral 48-hour mean StO<sub>2</sub>; or in MODEL 2: 48-hour mean mottling score. Abbreviations SAPS II, Simplified Acute Physiology Score, StO<sub>2</sub>, Tissue Oxygen Saturation



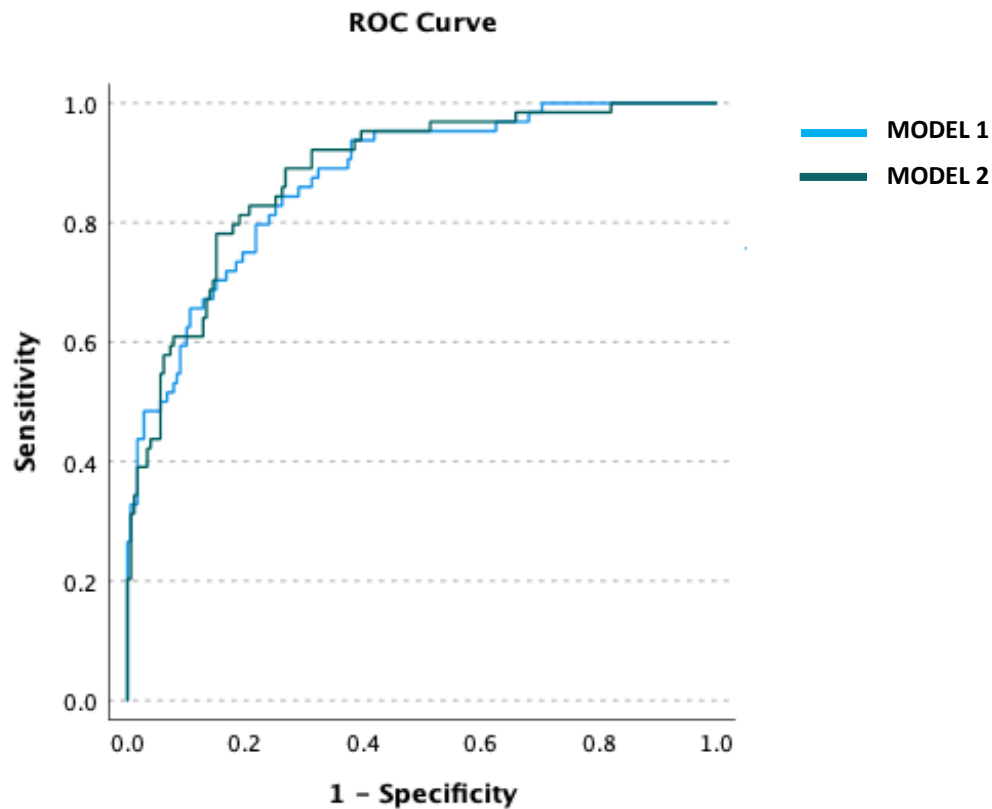

**Fig. S5b** ROC curves of logistic regression models at predicting 90-day mortality. Variables in the model; 48-hour mean capillary refill time; chronic kidney disease (moderate or severe) defined as glomerular filtration rate <60 ml/minute/1.73 m<sup>2</sup> or chronic dialysis at least one week prior to ICU admission; 48-hour mean lactate; 48-hour mean mean arterial pressure; 48-hour mean norepinephrine dose; 24-hour SAPS II score; smoking status (ever smoker); and in MODEL 1: peripheral 48-hour mean StO<sub>2</sub>; or in MODEL 2: 48-hour mean mottling score. Abbreviations SAPS II, Simplified Acute Physiology Score, StO<sub>2</sub>, Tissue Oxygen Saturation

**Table S4** Early versus late deaths

|                                                                       | Missing<br>n | Early deaths<br>(Within 48 h)<br>n=29 | Missing<br>n | Late deaths<br>(48 h to 90 d)<br>n=40 | p      |
|-----------------------------------------------------------------------|--------------|---------------------------------------|--------------|---------------------------------------|--------|
| Age (years)                                                           | 0            | 67.0 (61.5; 74.0)                     | 0            | 70.0 (61.0; 75.0)                     | 0.543  |
| Gender (female)                                                       | 0            | 15 (51.7)                             | 0            | 25 (62.5)                             | 0.461  |
| Total Charlson Comorbidity Index score                                | 0            | 4.0 (3.0; 6.0)                        | 0            | 6.0 (3.0; 7.0)                        | 0.062  |
| Smoking (ever)                                                        | 0            | 17 (58.6)                             | 0            | 25 (62.5)                             | 0.806  |
| Invasive mechanical ventilation                                       | 0            | 27 (93.1)                             | 0            | 36 (90.0)                             | 1.000  |
| Norepinephrine dose at enrolment                                      | 0            | 0.46 (0.28; 0.75)                     | 0            | 0.23 (0.12; 0.33)                     | 0.001  |
| Lactate at enrolment                                                  | 4            | 5.6 (3.7; 13.7)                       | 4            | 3.5 (2.1; 5.4)                        | <0.001 |
| Sepsis diagnosis at enrolment                                         | 0            | 24 (82.8)                             | 0            | 34 (85.0)                             | 1.000  |
| Septic shock diagnosis at enrolment                                   | 0            | 24 (82.8)                             | 0            | 27 (67.5)                             | 0.177  |
| AKI during days 1-7                                                   | 0            | 28 (96.6)                             | 0            | 33 (82.5)                             | 0.126  |
| RRT (CRRT or IHD or both) during days 1-7                             | 0            | 20 (69.0)                             | 0            | 15 (37.5)                             | 0.015  |
| SOFA 24h                                                              | 2            | 13.0 (12.0; 16.0)                     | 0            | 11.5 (9.0; 14.0)                      | 0.007  |
| SOFA max                                                              | 2            | 15.0 (13.0; 16.0)                     | 0            | 13.5 (9.3; 15.0)                      | 0.092  |
| SAPS II                                                               | 1            | 71.5 (58.0; 79.3)                     | 0            | 53.5 (46.0; 66.0)                     | <0.001 |
| APACHE                                                                | 1            | 32.5 (27.0; 37.8)                     | 0            | 26.0 (22.3; 34.0)                     | 0.027  |
| length of ICU stay (days)                                             | 0            | 1.4 (1.0; 1.6)                        | 0            | 6.7 (2.9; 10.4)                       | <0.001 |
| Treatment limitations                                                 | 0            | 5 (17.2)                              | 40           |                                       |        |
| Decision to withdraw life sustaining therapy due to treatment failure | 0            | 25 (86.2)                             | 40           |                                       |        |
| Mean arterial pressure (mmHg)                                         | 1            |                                       | 0            |                                       |        |
| 48-h mean                                                             |              | 62.7 (58.4; 67.1)                     |              | 71.0 (68.7; 76.5))                    | <0.001 |
| 48-h mean, 6 hours pre-death excluded                                 |              | 64.9 (59.9; 67.2)                     |              |                                       |        |
| Norepinephrine dose (µg/kg/min)                                       | 1            |                                       | 0            |                                       |        |
| 48-h mean                                                             |              | 0.41 (0.18; 0.65)                     |              | 0.19 (0.07; 0.39)                     | 0.023  |
| 48-h mean, 6 hours pre-death excluded                                 |              | 0.60 (0.42; 0.98)                     |              |                                       |        |
| Arterial lactate (mmol/l)                                             | 2            |                                       | 2            |                                       |        |
| 48-h mean                                                             |              | 7.5 (5.1; 11.2)                       |              | 2.6 (1.8; 4.3)                        | <0.001 |
| 48-h mean, 6 hours pre-death excluded                                 |              | 7.5 (4.6; 11.2)                       |              |                                       |        |
| Capillary refill time (s)                                             | 0            |                                       | 0            |                                       |        |
| 48-h mean                                                             |              | 13.1 (5.7; 21.9)                      |              | 7.1 (3.3; 13.5)                       | 0.031  |
| 48-h mean, 6 hours pre-death excluded                                 |              | 11.8 (5.2; 20.1)                      |              |                                       |        |
| Mottling score                                                        | 0            |                                       | 0            |                                       |        |
| 48-h mean                                                             |              | 0.6 (0.0; 1.9)                        |              | 0.26 (0.0; 1.5)                       | 0.396  |
| 48-h mean, 6 hours pre-death excluded                                 |              | 0.5 (0.0; 1.6)                        |              |                                       |        |
| Mean Peripheral StO <sub>2</sub> (%)                                  | 1            |                                       | 0            |                                       |        |
| 48-h mean                                                             |              | 57.1 (47.9; 64.7)                     |              | 64.8 (52.3; 69.4))                    | 0.090  |
| 48-h mean, 6 hours pre-death excluded                                 |              | 59.1 (48.2; 66.3)                     |              |                                       |        |

All continuous parameters are summarized as medians and interquartile ranges (IQR), categorical variables as counts and percentages.

Early deaths occurred within the 48-hour StO<sub>2</sub> monitoring period. Late deaths occurred later than 48 hours but within 90-days from study enrollment.

Abbreviations: SOFA, Sequential Organ Failure Assessment; Chronic Kidney Disease defined as glomerular filtration rate (GFR) <60 ml/minute/1.73 m<sup>2</sup> or chronic dialysis at least one week prior to ICU admission; APACHE, Acute Physiology and Chronic Health Evaluation; Sepsis and septic shock defined according to Sepsis-3 [17]; AKI, Acute Kidney Injury, defined by Kidney Disease Improving Global Outcomes (KDIGO) Clinical Practice Guidelines [18]; RRT, Renal Replacement Therapy; CRRT, Continuous Renal Replacement Therapy; IHD, Intermittent Hemodialysis; SAPS II, Simplified Acute Physiology Score; ICU, Intensive Care Unit; StO<sub>2</sub>, tissue oxygen saturation; mmHg, millimeters of mercury; bpm, beats per minute; µg/kg/min, micrograms per kilogram per minute; mmol/l, millimoles per liter; s, seconds; °C, degrees of Celsius; AUT, area under StO<sub>2</sub> threshold; AOT, area over StO<sub>2</sub> threshold; min, minutes.

**Table S5** Results of univariable analyses for organ dysfunction and 90-day mortality excluding data from the last six hours preceding the death in patients, who died within the 48-hour StO<sub>2</sub> monitoring period

|                                                   |              | Organ dysfunction       |                            |        | 90-day mortality   |                       |        |
|---------------------------------------------------|--------------|-------------------------|----------------------------|--------|--------------------|-----------------------|--------|
|                                                   | missing<br>n | SOFA-improvers<br>n=171 | SOFA-non-improvers<br>n=85 | p      | Survivors<br>n=187 | Non-survivors<br>n=69 | p      |
| Mean arterial pressure (mmHg) <sup>a</sup>        | 3            | 74.5 (70.2; 78.2)       | 69.4 (65.3; 74.4)          | <0.001 | 73.9 (70.2; 78.0)  | 68.9 (63.1; 73.5)     | <0.001 |
| Norepinephrine dose (µg/kg/min) <sup>a</sup>      | 4            | 0.10 (0.05; 0.24)       | 0.25 (0.07; 0.54)          | <0.001 | 0.10 (0.05; 0.23)  | 0.32 (0.13; 0.61)     | <0.001 |
| Arterial lactate (mmol/l) <sup>a</sup>            | 12           | 1.6 (1.1; 2.4)          | 2.9 (1.4; 5.4)             | <0.001 | 1.5 (1.1; 2.3)     | 4.1 (2.2; 6.2)        | <0.001 |
| Capillary refill time (s) <sup>a</sup>            | 0            | 4.5 (2.8; 7.4)          | 6.3 (3.2; 12.3)            | 0.010  | 4.3 (2.8; 7.2)     | 9.3 (3.9; 14.6)       | <0.001 |
| Mottling score <sup>a</sup>                       | 0            | 0.0 (0.0; 0.3)          | 0.1 (0.0; 0.9)             | 0.029  | 0.0 (0.0; 0.2)     | 0.4 (0.0; 1.5)        | <0.001 |
| Mean Peripheral StO <sub>2</sub> (%) <sup>a</sup> | 1            | 68.3 (57.5; 74.1)       | 64.7 (53.4; 70.8)          | 0.044  | 68.7 (58.2; 74.5)  | 61.8 (51.2; 67.4)     | <0.001 |

All continuous parameters are summarized as medians and interquartile ranges (IQR).

Organ dysfunction was defined as unchanged or worsening SOFA score or death within 7 days in intensive care unit.

Abbreviations: StO<sub>2</sub>, tissue oxygen saturation; SOFA, Sequential Organ Failure Assessment; h, hour; SOFA; improvers, patients whose SOFA score decreased during the 7 day follow-up; SOFA-non-improvers, patients whose SOFA score stayed the same or increased, or who died during the 7-day follow-up; mmHg, millimeters of mercury; bpm, beats per minute; µg/kg/min, micrograms per kilogram per minute; mmol/l, millimoles per liter; s, seconds; °C, degrees of Celsius; min, minutes.

<sup>a</sup> 48-h mean, 6 hours pre-death excluded, for the patients who died within the 48-hour StO<sub>2</sub> monitoring period

**A**

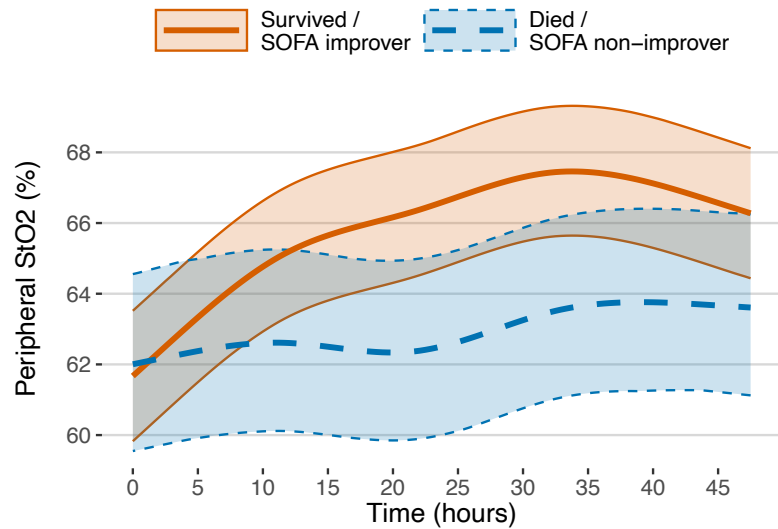

| Number of patients |              |      |       |       |       |       |       |       |       |       |  |
|--------------------|--------------|------|-------|-------|-------|-------|-------|-------|-------|-------|--|
| SOFA non-improver  | 85           | 84   | 79    | 75    | 68    | 60    | 53    | 46    | 41    | 31    |  |
| SOFA improver      | 171          | 170  | 170   | 170   | 170   | 168   | 161   | 159   | 152   | 141   |  |
|                    | 0-5          | 5-10 | 10-15 | 15-20 | 20-25 | 25-30 | 30-35 | 35-40 | 40-45 | 45-48 |  |
|                    | Time (hours) |      |       |       |       |       |       |       |       |       |  |

**B**

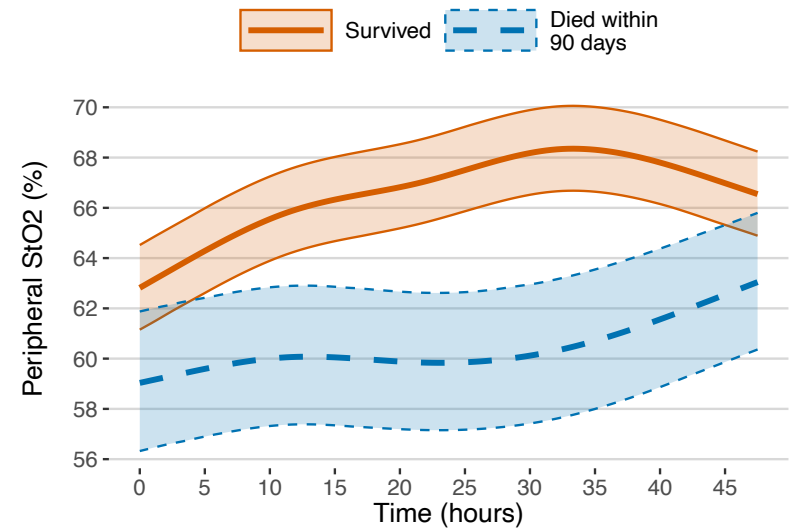

| Number of patients  |              |      |       |       |       |       |       |       |       |       |  |
|---------------------|--------------|------|-------|-------|-------|-------|-------|-------|-------|-------|--|
| 90-day non-survivor | 69           | 69   | 65    | 61    | 58    | 52    | 49    | 44    | 41    | 33    |  |
| 90-day survivor     | 187          | 185  | 184   | 184   | 180   | 176   | 165   | 161   | 152   | 139   |  |
|                     | 0-5          | 5-10 | 10-15 | 15-20 | 20-25 | 25-30 | 30-35 | 35-40 | 40-45 | 45-48 |  |
|                     | Time (hours) |      |       |       |       |       |       |       |       |       |  |

**Fig. S6a and S6b** Mean StO<sub>2</sub> and organ dysfunction and mean StO<sub>2</sub> and 90-day mortality estimated using linear mixed models. The last six hours of the StO<sub>2</sub> registration was excluded in the patients who died during the registration. Time was modeled using restricted cubic splines with 5 knots and interaction with organ dysfunction (Figure 6a) or 90-day mortality (Figure 6b). The shaded areas represent the 95% confidence interval. SOFA-improvers were patients, whose SOFA score decreased during the 7 day follow-up, and SOFA-non-improvers patients, whose SOFA score stayed the same or increased, or who died during the 7-day follow-up.

**Table S6a** Sensitivity, specificity, positive and negative predictive values, and likelihood ratios in predicting organ dysfunction

| Parameter                                       | Cut-off | Se (%) | 95% CI (%) | Sp (%) | 95% CI (%) | NPV (%) | 95% CI (%) | PPV (%) | 95% CI (%) | +LR  | 95% CI     | -LR  | 95% CI    |
|-------------------------------------------------|---------|--------|------------|--------|------------|---------|------------|---------|------------|------|------------|------|-----------|
| <b>StO<sub>2</sub> (%)</b> 0-48 h               | 60*     | 41.7   | 31.0-52.9  | 70.8   | 63.3-77.5  | 71.2    | 66.8-75.2  | 41.2    | 33.2-49.7  | 1.43 | 1.01-2.01  | 0.82 | 0.67-1.01 |
|                                                 | 50*     | 17.9   | 10.4-27.7  | 87.1   | 81.2-91.8  | 68.4    | 65.8-70.8  | 40.5    | 27.2-55.5  | 1.39 | 0.76-2.53  | 0.94 | 0.84-1.06 |
|                                                 | 40*     | 4.8    | 1.3-11.8   | 98.3   | 95.0-99.6  | 67.7    | 66.6-68.9  | 57.1    | 23.4-85.3  | 2.71 | 0.62-11.85 | 0.97 | 0.92-1.02 |
|                                                 | 80*     | 94.1   | 86.7-98.0  | 8.2    | 4.6-13.4   | 73.7    | 51.1-88.3  | 33.5    | 31.9-35.1  | 1.02 | 0.96-1.10  | 0.73 | 0.27-1.95 |
|                                                 | 66.5*   | 59.5   | 48.3-70.1  | 55.0   | 47.2-62.6  | 73.4    | 67.4-78.7  | 39.4    | 33.8-45.3  | 1.32 | 1.04-1.68  | 0.74 | 0.55-0.99 |
| <b>MAP (mmHg)</b> 0-48 h                        | 72.5*   | 69.1   | 58.0-78.7  | 60.4   | 52.6-67.8  | 79.7    | 73.6-84.7  | 46.4    | 40.6-52.3  | 1.74 | 1.38-2.20  | 0.51 | 0.36-0.72 |
| <b>HR (bpm)</b> 0-48 h                          | 91.7    | 57.1   | 45.9-67.9  | 54.4   | 46.6-62.1  | 71.9    | 65.8-77.2  | 38.4    | 32.7-44.4  | 1.25 | 0.98-1.61  | 0.79 | 0.59-1.04 |
| <b>Norepinephrine dose (µg/kg/min)</b> , 0-48 h | 0.13    | 66.3   | 55.1-76.3  | 57.4   | 49.6-65.0  | 77.6    | 71.4-82.8  | 43.3    | 37.7-49.1  | 1.56 | 1.23-1.96  | 0.59 | 0.42-0.82 |
| <b>Lactate (mmol/l)</b> , 0-48 h                | 1.8     | 63.8   | 52.2-74.2  | 56.7   | 48.8-64.4  | 76.2    | 70.0-81.5  | 41.8    | 36.1-47.8  | 1.47 | 1.16-1.87  | 0.64 | 0.46-0.88 |
| <b>CRT (s)</b> , 0-48 h                         | 5.0     | 62.4   | 51.2-72.6  | 56.7   | 48.9-64.3  | 75.2    | 69.1-80.4  | 41.7    | 36.1-47.6  | 1.44 | 1.14-1.83  | 0.66 | 0.49-0.90 |
| <b>Mottling score</b> , 0-48 h                  | 0.0     | 54.1   | 43.0-65.0  | 52.6   | 44.9-60.3  | 69.8    | 63.8-75.2  | 36.2    | 30.6-42.2  | 1.14 | 0.89-1.47  | 0.87 | 0.66-1.14 |

Organ dysfunction was defined as unchanged or worsening SOFA score or death within 7 days in intensive care unit.

Apart from the StO<sub>2</sub> cut-offs (60%, 50%, 40% and 80%), we did not predefine the cut-offs for other parameters. Therefore we chose to use median values calculated for the whole cohort (n=256) as cut-offs for different clinical parameters. An online calculator ([https://www.medcalc.org/calc/diagnostic\\_test.php](https://www.medcalc.org/calc/diagnostic_test.php)) served to determine these properties of diagnostic accuracy. Abbreviations: 95% CI, 95% confidence Interval; Se, sensitivity; Sp, Specificity; NPV, negative predictive value; PPV, positive predictive value; +LR, positive likelihood ratio; -LR, negative likelihood ratio; StO<sub>2</sub>, tissue oxygen saturation; MAP, mean arterial pressure; HR, heart rate; CRT, capillary refill time; mmHg, millimeters of mercury; bpm, beats per minute; µg/kg/min, micrograms per kilogram per minute; mmol/l, millimoles per liter; s, seconds.

\* values under the cut-off indicate positive test

**Table S6b** Sensitivity, specificity, positive and negative predictive values, and likelihood ratios in predicting death at 90-days

| Parameter                                       | Cut-off | Se (%) | 95% CI (%) | Sp (%) | 95% CI (%) | NPV (%) | 95% CI (%) | PPV (%) | 95% CI (%) | +LR  | 95% CI     | -LR  | 95% CI    |
|-------------------------------------------------|---------|--------|------------|--------|------------|---------|------------|---------|------------|------|------------|------|-----------|
| <b>StO<sub>2</sub> (%)</b> 0-48 h               | 60*     | 47.1   | 34.8-59.6  | 71.7   | 64.6-78.0  | 78.8    | 74.5-82.6  | 37.7    | 30.1-45.9  | 1.66 | 1.18-2.33  | 0.74 | 0.58-0.94 |
|                                                 | 50*     | 26.5   | 16.5-38.6  | 89.8   | 84.6-93.8  | 77.1    | 74.3-79.6  | 48.7    | 34.6-62.9  | 2.61 | 1.46-4.66  | 0.82 | 0.70-0.95 |
|                                                 | 40*     | 5.9    | 1.6-14.4   | 98.4   | 95.4-99.7  | 74.2    | 73.0-75.4  | 57.1    | 23.5-85.3  | 3.67 | 0.84-15.96 | 0.96 | 0.90-1.02 |
|                                                 | 80*     | 95.6   | 87.6-99.1  | 7.6    | 4.2-12.4   | 82.4    | 58.1-94.0  | 27.5    | 26.3-28.9  | 1.03 | 0.97-1.10  | 0.58 | 0.17-1.97 |
|                                                 | 66.5*   | 70.6   | 58.3-81.0  | 57.8   | 50.3-64.9  | 84.4    | 78.6-88.8  | 37.8    | 32.6-43.3  | 1.67 | 1.33-2.10  | 0.51 | 0.35-0.75 |
| <b>MAP (mmHg)</b> 0-48 h                        | 72.5*   | 73.5   | 61.4-83.5  | 59.5   | 52.0-66.6  | 85.9    | 80.2-90.2  | 40.0    | 34.7-45.5  | 1.81 | 1.45-2.27  | 0.45 | 0.29-0.67 |
| <b>HR (bpm)</b> 0-48 h                          | 91.7    | 66.2   | 53.7-77.2  | 56.8   | 49.3-64.0  | 82.0    | 76.2-86.7  | 36.0    | 30.7-41.6  | 1.53 | 1.21-1.94  | 0.60 | 0.42-0.85 |
| <b>Norepinephrine dose (µg/kg/min)</b> , 0-48 h | 0.13    | 75.0   | 63.0-84.7  | 58.7   | 51.2-65.9  | 86.4    | 80.5-90.7  | 40.2    | 35.0-45.5  | 1.82 | 1.46-2.26  | 0.43 | 0.28-0.65 |
| <b>Lactate (mmol/l)</b> , 0-48 h                | 1.8     | 84.6   | 73.5-92.4  | 62.6   | 55.0-69.7  | 91.8    | 86.2-95.2  | 45.1    | 39.8-50.5  | 2.26 | 1.82-2.81  | 0.25 | 0.14-0.44 |
| <b>CRT (s)</b> , 0-48 h                         | 5.0     | 71.0   | 58.8-81.3  | 58.3   | 50.9-65.4  | 84.5    | 78.7-88.9  | 38.6    | 33.4-44.1  | 1.70 | 1.36-2.14  | 0.50 | 0.34-0.73 |
| <b>Mottling score</b> , 0-48 h                  | 0.0     | 71.0   | 58.8-81.3  | 58.3   | 50.9-65.4  | 84.5    | 78.7-88.9  | 38.6    | 33.4-44.1  | 1.70 | 1.36-2.14  | 0.50 | 0.34-0.73 |

Apart from the StO<sub>2</sub> cut-offs (60%, 50%, 40% and 80%), we did not predefine the cut-offs for other parameters. Therefore we chose to use median values calculated for the whole cohort (n=256) as cut-offs for different clinical parameters. An online calculator ([https://www.medcalc.org/calc/diagnostic\\_test.php](https://www.medcalc.org/calc/diagnostic_test.php)) served to determine these properties of diagnostic accuracy. Abbreviations: 95% CI, 95% confidence Interval; Se, sensitivity; Sp, Specificity; NPV, negative predictive value; PPV, positive predictive value; +LR, positive likelihood ratio; -LR, negative likelihood ratio; StO<sub>2</sub>, tissue oxygen saturation; MAP, mean arterial pressure; HR, heart rate; CRT, capillary refill time; mmHg, millimeters of mercury; bpm, beats per minute; µg/kg/min, micrograms per kilogram per minute; mmol/l, millimoles per liter; s, seconds.

\* values under the cut-off indicate positive test

**Table S7** Results of logistic regression models for organ dysfunction and 90-day mortality excluding data from the last six hours preceding the death in patients, who died within the 48-hour StO<sub>2</sub> monitoring period

|                                          | Organ dysfunction                       |       | 90-day mortality                        |        |
|------------------------------------------|-----------------------------------------|-------|-----------------------------------------|--------|
| Variables in the model                   | Odds ratio<br>(95% Confidence interval) | p     | Odds ratio<br>(95% Confidence interval) | p      |
| <b>MODEL 1</b>                           |                                         |       |                                         |        |
| Capillary refill time <sup>a</sup>       | -                                       | ns    | -                                       | ns     |
| Chronic kidney disease                   | -                                       | ns    | 2.82 (1.06-7.52)                        | 0.038  |
| Lactate <sup>a</sup>                     | 1.28 (1.10-1.48)                        | 0.001 | 1.30 (1.10-1.54)                        | 0.002  |
| Mean arterial pressure <sup>a</sup>      | 0.92 (0.87-0.97)                        | 0.002 | 0.92 (0.86-0.98)                        | 0.007  |
| Norepinephrine dose <sup>a</sup>         | -                                       | ns    | -                                       | ns     |
| Peripheral StO <sub>2</sub> <sup>a</sup> | -                                       | ns    | -                                       | ns     |
| SAPS II score <sup>b</sup>               | -                                       | ns    | 1.05 (1.02-1.08)                        | <0.001 |
| Smoker (ever)                            | 2.52 (1.35-4.69)                        | 0.004 | 2.70 (1.28-5.69)                        | 0.009  |
| <b>MODEL 2</b>                           |                                         |       |                                         |        |
| Capillary refill time <sup>a</sup>       | -                                       | ns    | -                                       | ns     |
| Chronic kidney disease                   | -                                       | ns    | 3.11 (1.16-8.32)                        | 0.024  |
| Lactate <sup>a</sup>                     | 1.27 (1.10-1.47)                        | 0.001 | 1.28 (1.09-1.52)                        | 0.004  |
| Mean arterial pressure <sup>a</sup>      | 0.92 (0.87-0.97)                        | 0.002 | 0.92 (0.86-0.99)                        | 0.017  |
| Mottling score <sup>a</sup>              | -                                       | ns    | 1.82 (1.09-3.04)                        | 0.022  |
| Norepinephrine dose <sup>a</sup>         | -                                       | ns    | -                                       | ns     |
| SAPS II score <sup>b</sup>               | -                                       | ns    | 1.04 (1.02-1.07)                        | 0.002  |
| Smoker (ever)                            | 2.37 (1.28-4.37)                        | 0.006 | 2.43 (1.13-5.22)                        | 0.023  |

Binary logistic regression models (forward stepwise, conditional). Model 1 contains peripheral 48-hour mean StO<sub>2</sub> and Model 2 contains 48-hour mean mottling score instead.

Organ dysfunction was defined as unchanged or worsening SOFA score or death within 7 days in intensive care unit. Chronic kidney disease (moderate or severe) was defined as glomerular filtration rate <60 ml/minute/1.73 m<sup>2</sup> or chronic dialysis at least one week prior to ICU admission.

Abbreviations: SAPS II, Simplified Acute Physiology Score; MAP, Mean Arterial Pressure; StO<sub>2</sub>, Tissue Oxygen Saturation; ns, not significant

<sup>a</sup> 48-hour mean, 6 hours pre-death excluded for the patients, who died within the 48-hour StO<sub>2</sub> monitoring period

<sup>b</sup> 0-24 hours

**Table S8** Results of univariable and adjusted logistic regression models for delta variables within the first 48 hours and outcomes

|                                                |                      | Organ dysfunction      |       |                      |       | 90-day mortality       |       |                     |       |
|------------------------------------------------|----------------------|------------------------|-------|----------------------|-------|------------------------|-------|---------------------|-------|
|                                                |                      | Univariable            |       | Adjusted             |       | Univariable            |       | Adjusted            |       |
| Delta variable                                 | Mean (IQR)           | Odds ratio (95% CI)    | p     | Odds ratio (95% CI)  | p     | Odds ratio (95% CI)    | p     | Odds ratio (95% CI) | p     |
| Delta capillary refill time <sup>a</sup>       | -1.0 (-4.0; 1.0)     | 1.03 (1.01 - 1.06)     | 0.008 | 1.00 (0.97 - 1.02)   | 0.829 | 1.07 (1.03 - 1.10)     | 0.000 | 1.03 (1.00 - 1.07)  | 0.081 |
| Delta lactate <sup>a</sup>                     | -1.1 (-2.5; -0.3)    | 1.25 (1.13 - 1.40)     | 0.000 | 1.03 (0.92 - 1.18)   | 0.628 | 1.25 (1.13 - 1.41)     | 0.000 | 1.03 (0.92 - 1.19)  | 0.621 |
| Delta mean arterial pressure <sup>b</sup>      | 3.9 (-5.1; 14.2)     | 0.95 (0.93 - 0.96)     | 0.000 | 0.95 (0.93 - 0.98)   | 0.000 | 0.94 (0.92 - 0.96)     | 0.000 | 0.95 (0.93 - 0.98)  | 0.000 |
| Delta norepinephrine dose <sup>b</sup>         | -0.10 (-0.22; -0.03) | 59.13 (14.69 - 298.97) | 0.000 | 15.86 (2.99 - 99.53) | 0.002 | 42.37 (11.22 - 196.13) | 0.000 | 8.34 (1.61 - 49.91) | 0.015 |
| Delta mottling score <sup>a</sup>              | 0.0 (0.0; 0.0)       | 1.50 (1.12 - 2.07)     | 0.009 | 1.00 (0.68 - 1.50)   | 0.984 | 1.63 (1.19 - 2.33)     | 0.004 | 1.02 (0.69 - 1.55)  | 0.939 |
| Delta peripheral StO <sub>2</sub> <sup>b</sup> | 1.8 (-5.6; 8.4)      | 0.95 (0.92 - 0.97)     | 0.000 | 0.95 (0.92 - 0.98)   | 0.005 | 0.95 (0.93 - 0.98)     | 0.000 | 0.98 (0.95 - 1.01)  | 0.297 |

Organ dysfunction was defined as unchanged or worsening SOFA score or death within 7 days in intensive care unit.

Abbreviations: IQR, inter quartile range; 95% CI, 95% confidence interval

<sup>a</sup> Delta value calculated as a difference of the first and the last observation within the first 48 hours

<sup>b</sup> Delta value calculated as a difference of the means of the first and the last observation hours within the first 48 hour



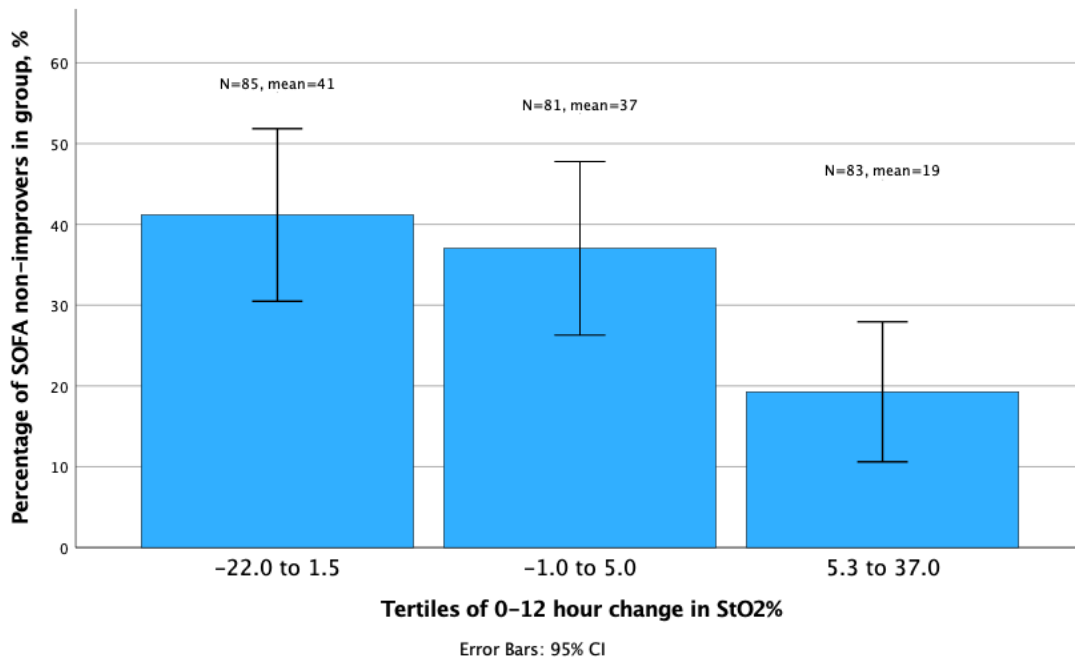

**Fig. S7a** Tertiles of delta StO<sub>2</sub> over the first 12 hours and organ dysfunction. SOFA-non-improvers were patients whose SOFA score stayed the same or increased, or who died during the 7-day follow-up in ICU. Delta StO<sub>2</sub> values were calculated as a difference of the median of the first and the 12<sup>th</sup> observation hour.

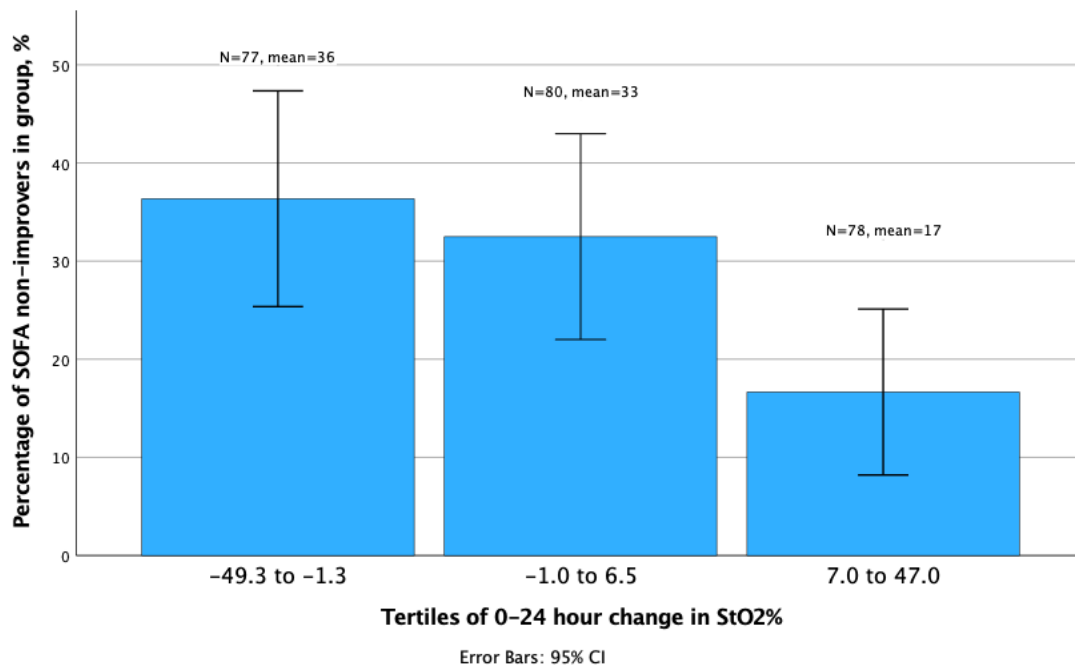

**Fig. S7b** Tertiles of delta StO<sub>2</sub> over the first 24 hours and organ dysfunction. SOFA-non-improvers were patients whose SOFA score stayed the same or increased, or who died during the 7-day follow-up in ICU. Delta StO<sub>2</sub> values were calculated as a difference of the median of the first and the 24<sup>th</sup> observation hour. The odds ratio for the 24-hour delta StO<sub>2</sub> for organ dysfunction was 0.95 (95% confidence interval 0.92-0.98, p=0.001) and 0.96 (95% confidence interval 0.92-0.98, p=0.004) when excluding the last 6 hours of data in the patients, who died within the first 48 hours.

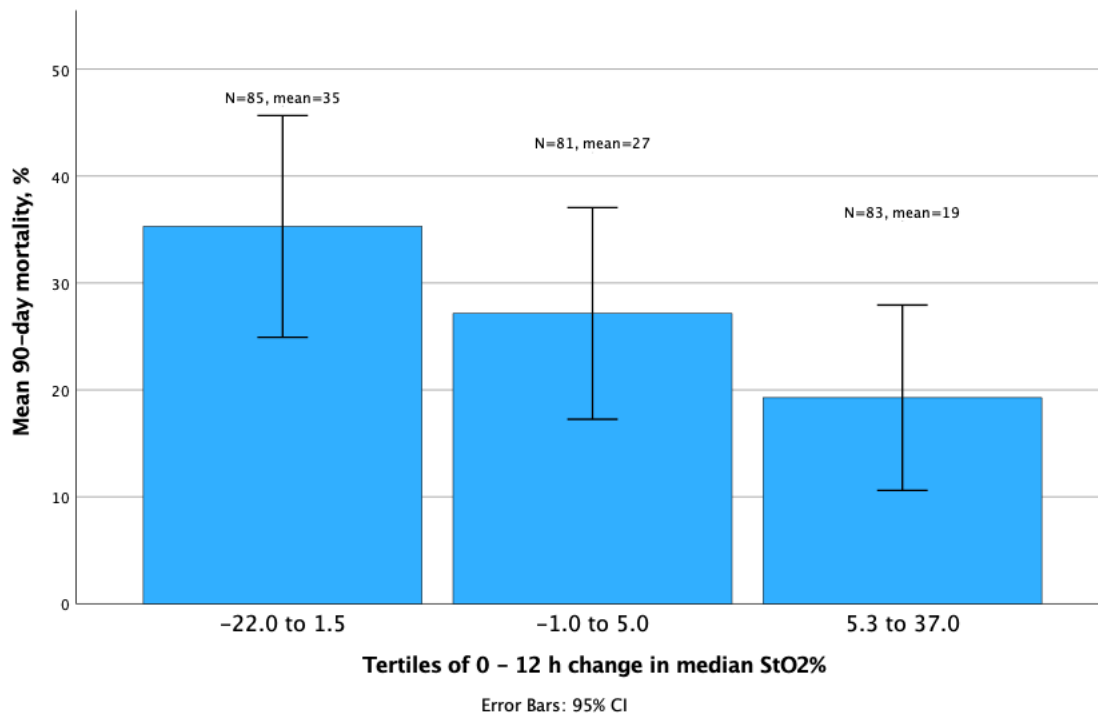

**Fig. S7c** Tertiles of delta StO<sub>2</sub> over the first 12 hours and 90-day mortality. SOFA-non-improvers were patients whose SOFA score stayed the same or increased, or who died during the 7-day follow-up in ICU. Delta StO<sub>2</sub> values were calculated as a difference of the median of the first and the 12<sup>th</sup> observation hour.

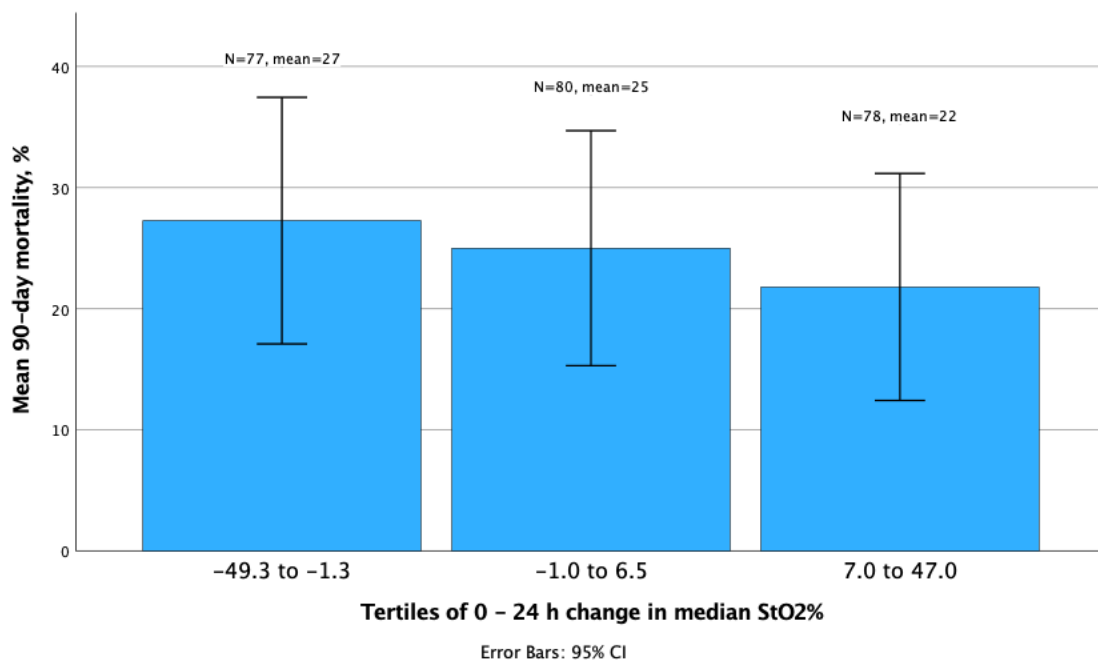

**Fig. S7d** Tertiles of delta StO<sub>2</sub> over the first 24 hours and 90-day mortality. SOFA-non-improvers were patients whose SOFA score stayed the same or increased, or who died during the 7-day follow-up in ICU. Delta StO<sub>2</sub> values were calculated as a difference of the median of the first and the 24<sup>th</sup> observation hour. The odds ratio for the 24-hour delta StO<sub>2</sub> for 90-day mortality was 0.97 (95% confidence interval 0.94-0.99, p=0.022) and 0.97 (95% confidence interval 0.94-1.00, p=0.076) when excluding the last 6 hours of data in the patients, who died within the first 48 hours.

**Table S9** Patient characteristics of sepsis sub-group

|                                           |              |                       | Organ dysfunction       |                             |        | 90-day mortality   |                       |        |
|-------------------------------------------|--------------|-----------------------|-------------------------|-----------------------------|--------|--------------------|-----------------------|--------|
|                                           | Missing<br>n | All patients<br>n=206 | SOFA-improvers<br>n=139 | SOFA-non-improvers<br>n= 67 | p      | Survivors<br>n=148 | Non-survivors<br>n=58 | p      |
| Age (years)                               | 0            | 66.0 (57.0; 72.0)     | 67.0 (56.0; 73.0)       | 64 (58.0; 70.0)             | 0.409  | 64.0 (54.0; 72.0)  | 67.5 (61.0; 73.0)     | 0.070  |
| Gender (female)                           | 0            | 92 (44.7)             | 57 (41.0)               | 35 (52.2)                   | 0.137  | 66 (44.6)          | 26 (44.8)             | 1.000  |
| Co-morbidity                              |              |                       |                         |                             |        |                    |                       |        |
| Total Charlson Comorbidity Index score    | 0            | 4.0 (2.0; 6.0)        | 4.0 (2.0; 6.0)          | 4.0 (2.0; 6.0)              | 0.882  | 4.0 (2.0; 5.0)     | 5.0 (3.0; 7.0)        | 0.002  |
| Diabetes mellitus                         | 0            | 65 (31.6)             | 41 (29.5)               | 24 (35.8)                   | 0.424  | 42 (28.4)          | 23 (39.7)             | 0.135  |
| Peripheral or cerebral arterial disease   | 0            | 43 (20.9)             | 29 (20.9)               | 14 (20.9)                   | 1.000  | 27 (18.2)          | 16 (27.6)             | 0.181  |
| Coronary artery disease                   | 0            | 21 (10.2)             | 16 (11.5)               | 95(7.5)                     | 0.465  | 13 (8.8)           | 8 (13.8)              | 0.310  |
| Hypertension                              | 0            | 121 (58.7)            | 84 (60.4)               | 37 (55.2)                   | 0.546  | 83 (56.1)          | 38 (65.5)             | 0.271  |
| Chronic kidney disease                    | 0            | 27 (13.1)             | 17 (12.2)               | 10 (14.9)                   | 0.661  | 16 (10.8)          | 11 (19.0)             | 0.166  |
| Chronic heart failure                     | 0            | 16 (7.8)              | 12 (8.6)                | 4 (6.0)                     | 0.590  | 12 (8.1)           | 4 (6.9)               | 1.000  |
| Smoking (ever)                            | 0            | 95 (46.1)             | 53 (38.1)               | 42 (62.7)                   | 0.001  | 60 (40.5)          | 35 (60.3)             | 0.013  |
| APACHE IV diagnostic group                | 0            |                       |                         |                             |        |                    |                       |        |
| cardiovascular (non-operative)            |              | 58 (28.2)             | 38 (27.3)               | 20 (29.9)                   | 0.934  | 44 (29.7)          | 14 (24.1)             | 0.783  |
| respiratory tract (non-operative)         |              | 17 (8.3)              | 13 (9.4)                | 4 (6.0)                     |        | 11 (7.4)           | 6 (10.3)              |        |
| gastrointestinal tract (non-operative)    |              | 13 (6.3)              | 9 (6.5)                 | 4 (6.0)                     |        | 9 (6.1)            | 4 (6.9)               |        |
| gastrointestinal tract (operative)        |              | 79 (38.3)             | 56 (40.3)               | 23 (34.3)                   |        | 55 (37.2)          | 24 (41.4)             |        |
| other (<5% each)                          |              | 37 (18.0)             | 23 (16.5)               | 16 (23.8)                   |        | 29 (19.6)          | 10 (17.3)             |        |
| Invasive mechanical ventilation           | 0            | 157 (76.2)            | 106 (76.3)              | 51 (76.1)                   | 1.000  | 105 (70.9)         | 52 (89.7)             | 0.004  |
| Norepinephrine dose at enrolment          | 0            | 0.22 (0.12; 0.39)     | 0.20 (0.11; 0.33)       | 0.28 (0.16; 0.49)           | 0.010  | 0.20 (0.11; 0.33)  | 0.33 (0.16; 0.56)     | 0.002  |
| Lactate at enrolment                      | 20           | 2.5 (1.5; 4.8)        | 2.2 (1.4; 3.7)          | 3.9 (1.6; 6.0)              | 0.004  | 2.2 (1.3; 3.6)     | 4.5 (2.9; 8.4)        | <0.001 |
| Dominant shock type                       | 3            |                       |                         |                             |        |                    |                       |        |
| Distributive                              |              | 185 (91.1)            | 126 (90.6)              | 59 (92.2)                   | 1.000  | 132 (90.4)         | 53 (93.0)             | 1.000  |
| Cardiogenic                               |              | 5 (2.5)               | 4 (2.9)                 | 1 (1.6)                     |        | 4 (2.7)            | 1 (1.8)               |        |
| Hypovolemic                               |              | 13 (6.4)              | 9 (6.5)                 | 4 (6.3)                     |        | 10 (6.8)           | 3 (5.3)               |        |
| Obstructive                               |              | 0                     | 0                       | 0                           |        | 0                  | 0                     |        |
| Septic shock diagnosis at enrolment       | 0            | 151 (73.3)            | 98 (70.5)               | 53 (79.1)                   | 0.240  | 100 (67.6)         | 51 (87.9)             | 0.003  |
| AKI during days 1-7                       | 0            | 130 (63.1)            | 79 (56.8)               | 51 (76.1)                   | 0.009  | 79 (53.4)          | 51 (87.9)             | <0.001 |
| RRT (CRRT or IHD or both) during days 1-7 | 0            | 61 (29.6)             | 27 (19.4)               | 34 (50.7)                   | <0.001 | 32 (21.6)          | 29 (50.0)             | <0.001 |
| SOFA 24h                                  | 1            | 9.0 (7.0; 13.0)       | 9.0 (7.0; 12.0)         | 10.0 (7.0; 13.0)            | 0.135  | 9.0 (7.0; 11.0)    | 12.0 (9.0; 15.0)      | <0.001 |
| length of ICU stay (days)                 | 0            | 4.1 (2.1; 7.6)        | 5.2 (2.9; 9.2)          | 1.8 (1.3; 4.5)              | <0.001 | 4.7 (2.3; 8.2)     | 2.2 (1.5; 7.4)        | 0.014  |
| ICU mortality                             | 0            | 40 (19.4)             | 4 (2.9)                 | 36 (53.7)                   | <0.001 | 0                  | 40 (69.0)             |        |
| 28-day mortality                          | 0            | 54 (26.2)             | 15 (10.8)               | 39 (58.2)                   | <0.001 | 0                  | 54 (93.1)             |        |
| 90-day mortality                          | 0            | 58 (28.2)             | 17 (12.2)               | 41 (61.2)                   | <0.001 | 0                  | 58 (100)              |        |

Continuous variables are summarized as medians with interquartile ranges (IQR), categorical variables as counts and percentages.

Organ dysfunction was defined as unchanged or worsening SOFA score or death within 7 days in intensive care unit.

Abbreviations: SOFA, Sequential Organ Failure Assessment; SOFA-improvers, patients whose SOFA score decreased during the 7 day follow-up; SOFA-non-improvers, patients whose SOFA score stayed the same or increased, or who died during the 7-day follow-up; Chronic Kidney Disease defined as glomerular filtration rate (GFR) <60 ml/minute/1.73 m<sup>2</sup> or chronic dialysis at least one week prior to ICU admission; APACHE, Acute Physiology and Chronic Health Evaluation; Sepsis and septic shock defined according to Sepsis-3 [17]; AKI, Acute Kidney Injury, defined by Kidney Disease Improving Global Outcomes (KDIGO) Clinical Practice Guidelines [18]; RRT, Renal Replacement Therapy; CRRT, Continuous Renal Replacement Therapy; IHD, Intermittent Hemodialysis; SAPS II, Simplified Acute Physiology Score; ICU, Intensive Care Unit.

**Table S10** Results of univariable analyses for organ dysfunction and 90-day mortality for sepsis sub-group

|                                                              |              | Organ dysfunction       |                            |        | 90-day mortality      |                         |        |
|--------------------------------------------------------------|--------------|-------------------------|----------------------------|--------|-----------------------|-------------------------|--------|
|                                                              | missing<br>n | SOFA-improvers<br>n=139 | SOFA-non-improvers<br>n=67 | p      | Survivors<br>n=148    | Non-survivors<br>n=58   | p      |
| SOFA -score <sup>a</sup>                                     | 1            | 9.0 (7.0; 12.0)         | 10.0 (7.0; 13.0)           | 0.135  | 9.0 (7.0; 11.0)       | 12.0 (9.0; 15.0)        | <0.001 |
| SAPS II <sup>a</sup>                                         | 2            | 43.0 (36.0; 56.3)       | 54.5 (37.5; 67.0)          | 0.011  | 41.0 (34.0; 52.0)     | 61.0 (51.0; 72.0)       | <0.001 |
| APACHE <sup>a</sup>                                          | 2            | 23.0 (18.0; 29.0)       | 27.0 (20.0; 34.3)          | 0.013  | 22.0 (18.0; 28.0)     | 30.0 (24.0; 35.0)       | <0.001 |
| Mean arterial pressure (mmHg) <sup>b</sup>                   | 2            | 74.1 (70.1; 78.2)       | 69.0 (62.5; 73.0)          | <0.001 | 73.8 (69.9; 77.7)     | 69.0 (61.8; 72.7)       | <0.001 |
| Heart rate (bpm) <sup>b</sup>                                | 2            | 90.8 (80.4; 102.5)      | 96.1 (80.5; 107.9)         | 0.281  | 89.8 (79.3; 101.9)    | 96.7 (83.3; 108.4)      | 0.022  |
| Norepinephrine dose (µg/kg/min) <sup>b</sup>                 | 3            | 0.10 (0.05; 0.23)       | 0.23 (0.08; 0.44)          | <0.001 | 0.10 (0.04; 0.22)     | 0.25 (0.13; 0.49)       | <0.001 |
| Arterial lactate (mmol/l) <sup>b</sup>                       | 9            | 1.5 (1.0; 2.4)          | 3.0 (1.4; 5.8)             | <0.001 | 1.4 (1.0; 2.3)        | 4.2 (2.0; 6.3)          | <0.001 |
| Capillary refill time (s) <sup>b</sup>                       | 0            | 4.5 (2.7; 6.9)          | 5.6 (3.1; 13.1)            | 0.037  | 4.2 (2.5; 6.6)        | 9.4 (3.9; 15.4)         | <0.001 |
| Mottling score <sup>b</sup>                                  | 0            | 0.0 (0.0; 0.3)          | 0.0 (0.0; 0.6)             | 0.110  | 0.0 (0.0; 0.1)        | 0.4 (0.0; 1.6)          | <0.001 |
| Peripheral temperature (°C) <sup>b</sup>                     | 1            | 33.0 (31.8; 34.1)       | 32.4 (30.9; 33.8)          | 0.055  | 32.9 (31.7; 34.1)     | 32.5 (31.1; 33.8)       | 0.062  |
| Central to peripheral temperature gradient (°C) <sup>b</sup> | 4            | 4.1 (2.7; 5.2)          | 4.0 (2.4; 5.4)             | 0.964  | 4.0 (2.7; 5.2)        | 4.0 (2.5; 5.4)          | 0.786  |
| Mean Peripheral StO <sub>2</sub> (%) <sup>b</sup>            | 1            | 67.8 (56.6; 74.1)       | 64.8 (51.8; 71.6)          | 0.080  | 68.8 (57.5; 74.8)     | 62.0 (49.6; 67.8)       | <0.001 |
| AUT below StO <sub>2</sub> thresholds (%min) <sup>b</sup>    |              |                         |                            |        |                       |                         |        |
| 60 %                                                         | 0            | 1904.5 (13.8; 12820.8)  | 1426.8 (13.5; 14506.5)     | 0.753  | 1001.1 (1.2; 10912.0) | 3535.3 (498.9; 21756.1) | 0.004  |
| 50 %                                                         | 0            | 66.5 (0.0; 2587.5)      | 70.3 (0.0; 3579.0)         | 0.781  | 19.5 (0.0; 2031.7)    | 571.1 (0.0; 6220.5)     | 0.012  |
| 40 %                                                         | 0            | 0.0 (0.0; 292.8)        | 0.0 (0.0; 856.5)           | 0.484  | 0.0 (0.0; 241.0)      | 16.5 (0.0; 1156.1)      | 0.014  |
| AOT above StO <sub>2</sub> 80 % (%min) <sup>b</sup>          | 0            | 58.0 (0.0; 1494.0)      | 0.0 (0.0; 66.3)            | 0.001  | 63.0 (0.0; 1860.1)    | 0.0 (0.0; 22.8)         | <0.001 |
| Time below StO <sub>2</sub> thresholds (min) <sup>b</sup>    |              |                         |                            |        |                       |                         |        |
| 60 %                                                         | 1            | 227.0 (6.5; 1432.0)     | 308.0 (8.8; 1145.0)        | 0.941  | 136.8 (1.1; 1292.4)   | 609.5 (117.5; 1648.0)   | 0.012  |
| 50 %                                                         | 1            | 7.5 (0.0; 346.5)        | 21.0 (0.0; 555.5)          | 0.883  | 3.0 (0.0; 319.1)      | 134.5 (0.0; 734.5)      | 0.020  |
| 40 %                                                         | 1            | 0.0 (0.0; 28.0)         | 0.0 (0.0; 91.8)            | 0.571  | 0.0 (0.0; 15.3)       | 3.0 (0.0; 148.3)        | 0.009  |
| Time above StO <sub>2</sub> 80 % (min) <sup>b</sup>          | 1            | 15.5 (0.0; 460.0)       | 0.0 (0.0; 47.2)            | 0.002  | 19.8 (0.0; 469.5)     | 0.0 (0.0; 11.0)         | <0.001 |

All continuous parameters are summarized as medians and interquartile ranges (IQR).

Organ dysfunction was defined as unchanged or worsening SOFA score or death within 7 days in intensive care unit.

Abbreviations: StO<sub>2</sub>, tissue oxygen saturation; SOFA, Sequential Organ Failure Assessment; h, hour; SOFA; improvers, patients whose SOFA score decreased during the 7 day follow-up; SOFA-non-improvers, patients whose SOFA score stayed the same or increased, or who died during the 7-day follow-up; SAPS II, Simplified Acute Physiology Score; APACHE, Acute Physiology and Chronic Health Evaluation II; mmHg, millimeters of mercury; bpm, beats per minute; µg/kg/min, micrograms per kilogram per minute; mmol/l, millimoles per liter; s, seconds; °C, degrees of Celsius; AUT, area under StO<sub>2</sub> threshold; AOT, area over StO<sub>2</sub> threshold; min, minutes.

<sup>a</sup> 0-24 hours

<sup>b</sup> 48-hour mean

**Table S11** Results of logistic regression models for organ dysfunction and 90-day mortality for sepsis sub-group

|                                          | Organ dysfunction                       |       | 90-day mortality                        |        |
|------------------------------------------|-----------------------------------------|-------|-----------------------------------------|--------|
| Variables in the model                   | Odds ratio<br>(95% Confidence interval) | p     | Odds ratio<br>(95% Confidence interval) | p      |
| <b>MODEL 1</b>                           |                                         |       |                                         |        |
| Capillary refill time <sup>a</sup>       | -                                       | ns    | -                                       | ns     |
| Chronic kidney disease                   | -                                       | ns    | -                                       | ns     |
| Lactate <sup>a</sup>                     | 1.30 (1.09-1.56)                        | 0.004 | 1.42 (1.18-1.72)                        | <0.001 |
| Mean arterial pressure <sup>a</sup>      | 0.91 (0.86-0.97)                        | 0.003 | -                                       | ns     |
| Norepinephrine dose <sup>a</sup>         | -                                       | ns    | -                                       | ns     |
| Peripheral StO <sub>2</sub> <sup>a</sup> | -                                       | ns    | 0.96 (0.93-1.00)                        | 0.023  |
| SAPS II score <sup>b</sup>               | -                                       | ns    | 1.06 (1.03-1.09)                        | <0.001 |
| Smoker (ever)                            | 2.3 (1.33-4.68)                         | 0.021 | -                                       | ns     |
| <b>MODEL 2</b>                           |                                         |       |                                         |        |
| Capillary refill time <sup>a</sup>       | -                                       | ns    | -                                       | ns     |
| Chronic kidney disease                   | -                                       | ns    | -                                       | ns     |
| Lactate <sup>a</sup>                     | 1.31 (1.09-1.58)                        | 0.003 | 1.36 (1.14-1.62)                        | <0.001 |
| Mean arterial pressure <sup>a</sup>      | 0.91 (0.85-0.97)                        | 0.003 | -                                       | ns     |
| Mottling score <sup>a</sup>              | -                                       | ns    | 1.89 (1.09-3.28)                        | 0.024  |
| Norepinephrine dose <sup>a</sup>         | -                                       | ns    | -                                       | ns     |
| SAPS II score <sup>b</sup>               | -                                       | ns    | 1.06 (1.02-1.09)                        | <0.001 |
| Smoker (ever)                            | 2.25 (1.11-4.57)                        | 0.024 | -                                       | ns     |

Binary logistic regression models (forward stepwise, conditional). Model 1 contains peripheral 48-hour mean StO<sub>2</sub> and Model 2 contains 48-hour mean mottling score instead.

Organ dysfunction was defined as unchanged or worsening SOFA score or death within 7 days in intensive care unit. Chronic kidney disease (moderate or severe) was defined as glomerular filtration rate <60 ml/minute/1.73 m<sup>2</sup> or chronic dialysis at least one week prior to ICU admission.

Abbreviations: SAPS II, Simplified Acute Physiology Score; MAP, Mean Arterial Pressure; StO<sub>2</sub>, Tissue Oxygen Saturation; ns, not significant

<sup>a</sup> 48-hour mean

<sup>b</sup> 0-24 hours

**Table S12** Reported problems in NIRS-monitoring.

| Problem                            | Missing n | All patients<br>n=256 |
|------------------------------------|-----------|-----------------------|
| Detachment of the cords            | 16        | 21/240 (8.8%)         |
| Detachment of the probes           | 16        | 17/240 (7.1%)         |
| Monitor related problems           | 16        | 4/240 (1.7%)          |
| Problems with patient's skin       | 16        | 3/240 (1.3%)          |
| Problems with patient positioning  | 16        | 2/240 (0.8%)          |
| Problems with patient mobilization | 16        | 1/240 (0.4%)          |
| Other                              | 16        | 6/240 (2.5%)          |

## References

1. Fliser D, Laville M, Covic A, Fouque D, Vanholder R, Juillard L, Van Biesen W. A European Renal Best Practice (ERBP) position statement on the Kidney Disease Improving Global Outcomes (KDIGO) clinical practice guidelines on acute kidney injury: part 1: definitions, conservative management and contrast-induced nephropathy. *Nephrol Dial Transplant*. 2012;27(12):4263-4272.
